# Supplementary material for: High-speed, high-purity separation of gold nanoparticle–DNA origami constructs using centrifugation
Source: Royal Society of Chemistry journal article supplement (doi:10.1039/c4sm01071j), 2014-07-23
Supplement: c4sm01071j1.pdf [file c4sm01071j1.pdf]

## Supplementary information

*for*

### High-speed, high-purity separation of gold nanoparticle-DNA origami constructs using centrifugation

*Seung Hyeon Ko, Fernando Vargas-Lara, Paul N. Patrone, Samuel M. Stavis, Francis W. Starr, Jack F. Douglas, and J. Alexander Liddle\**

#### Experimental

**Disclaimer:** Certain commercial equipment, instruments, or materials are identified in order to specify the experimental procedure adequately. Such identification is not intended to imply recommendation or endorsement by the National Institute of Standards and Technology, nor is it intended to imply that the materials or equipment identified are necessarily the best available for the purpose.

**Materials:** We purchased single strand M13mp18 and thiol conjugated single-stranded DNA strands commercially. We purchased all unmodified and poly-A labeled DNA staple strands commercially, and used them without further purification. We purchased colloidal solutions of AuNPs and all other chemicals commercially.  $1\times$  TAE/Mg<sup>2+</sup> buffer contains 40 mmol L<sup>-1</sup> (mM) tris(hydroxymethyl)aminomethane (tris), 20 mmol L<sup>-1</sup> (mM) acetic acid, 2 mmol L<sup>-1</sup> (mM) ethylenediaminetetraaceticacid (EDTA), and 12.5 mmol L<sup>-1</sup> (mM) magnesium acetate, pH 8.0 and  $0.5\times$  TBE buffer has 45 mmol L<sup>-1</sup> (mM) tris(hydroxymethyl)aminomethane (tris), 45 mmol L<sup>-1</sup> (mM) Boric acid, and 1 mmol L<sup>-1</sup> (mM) ethylenediaminetetraaceticacid (EDTA).

**Self-assembly of DNA origami:** We assembled rectangular DNA origami according to the method of Rothemund.<sup>1</sup> We mixed a long single strand of M13mp18 and staple strands at a molar ratio of 1 to 5 in  $1\times$  TAE/Mg<sup>2+</sup> buffer and slowly annealed the strands at 1 °C min<sup>-1</sup>

---

\* E-mail: liddle@nist.gov

from 95 °C to room temperature using a DNA thermal cycler. We removed excess staple strands by washing four to five times with 1× TAE/Mg<sup>2+</sup> buffer (400 μL) in a “100 000 molecular weight cut-off (MWCO) filter” (100 kDa MWCO) microcentrifuge filter at an acceleration of 600 rad s<sup>-1</sup> (5 730 rpm, 34 355 m s<sup>-2</sup>, 3 500 × g) for 2 min. We omitted staple strands on vertical edges to avoid stacking of origami along vertical edges.

**Functionalization of AuNP with ssDNA:** We stabilized AuNPs by adsorption of bis(parasulfonatophenyl) phenylphosphine dihydrate dipotassium salt (phosphine salt). Typically, we added 10 mg of phosphine salt to 50 mL of AuNP solution, shaking the mixture overnight at room temperature. We then precipitated the AuNPs by adding sodium chloride until the color turned bluish purple. After centrifugation at 850 rad s<sup>-1</sup> (68 670 m s<sup>-2</sup>, 7 000 × g) for several minutes, we removed the supernatant with a pipette, and re-dispersed the AuNP precipitate in 2.5 mmol L<sup>-1</sup> (mM) phosphine solution. We mixed dithiolated DNA and phosphine-protected AuNPs at various molar ratios, which depended on the size of AuNPs, and pre-incubated for an hour. We added solutions of TBE buffer (10×), SDS (0.01%) and NaCl (1 mol L<sup>-1</sup>) to pre-incubated AuNPs and ssDNA and brought the final concentrations of TBE, SDS, and NaCl to 0.5×, 0.01%, and 0.05 mol L<sup>-1</sup> (M), respectively. We left the solution of AuNP/DNA in buffer for two hours at room temperature. We slowly increased the NaCl concentration of the solution to 0.5 mol L<sup>-1</sup> (M) by sequential additions of 0.5× TBE buffer (0.01% SDS)/1 mol L<sup>-1</sup> (M) NaCl and incubated the mixture for 24 h at room temperature. We purified conjugates of ssDNA-AuNP by spin column in a microcentrifuge.

**Preparation of AuNP-DNA Origami Constructs:** We mixed DNA origami solution with ssDNA functionalized AuNP solution at 1.3× to 2× molar ratio to the binding locations on an origami and slowly annealed the solution from 37 °C to room temperature using a DNA thermal cycler.

***Centrifugation of AuNP-DNA Origami Constructs:*** We used a medium of nine-layers of different concentrations of iodixanol (10%, 15%, ..., 50%) for centrifugation of AuNP-DNA origami constructs. We denote the different constructs as  $n$ AuNP-origami, where  $n$  is the number of AuNP bound to an origami. We prepared iodixanol solutions of different concentrations as follows: we first diluted commercial (Optiprep™, Sigma-Aldrich), 60% (w/v) iodixanol in water by  $6\times$  TAE/Mg<sup>2+</sup> (*i.e.*, 6 times more concentrated than  $1\times$  TAE/Mg<sup>2+</sup>) to 50% iodixanol in  $1\times$  TAE/Mg<sup>2+</sup>. We prepared all other solutions by sequential dilution of 50% iodixanol in  $1\times$  TAE/Mg<sup>2+</sup> with  $1\times$  TAE/Mg<sup>2+</sup>. We prepared the nine-layer density gradient medium in a centrifuge tube a day prior to centrifugation. We loaded the sample solution on top of the density gradient in the centrifuge tube, and then centrifuged it at various speeds (in an Eppendorf Microcentrifuge, Model 5417R) depending on the size of AuNP to get separation of bands. We used a swing bucket rotor (Eppendorf A-8-11) in all experiments and the centrifuge temperature was set to 20 °C with an uncertainty, as specified by the vendor, of  $\pm 2$  °C. We recovered each band from the medium after sedimentation of the constructs was complete by pipetting. We buffer-exchanged the iodixanol medium for  $1\times$  TAE/Mg<sup>2+</sup> buffer by spin column.

***Scanning Electron Microscope (SEM) Characterization of AuNP-DNA Origami Constructs:*** A silicon wafer was treated with oxygen plasma before SEM imaging. We loaded a solution of AuNP-DNA origami (5  $\mu$ L) onto an oxygen plasma-treated Si wafer, allowed it to rest for a minute, and quickly washed the wafer with water. We imaged the sample by SEM with an incident electron energy of 1.0 kV.

***Dynamic Light Scattering (DLS) Measurements of AuNP-DNA Origami Constructs:*** We performed dynamic light scattering measurements using non-invasive backscatter optics with 45  $\mu$ L samples in low-volume quartz batch cuvette. We set the temperature to 20 °C.

## Results and Analysis

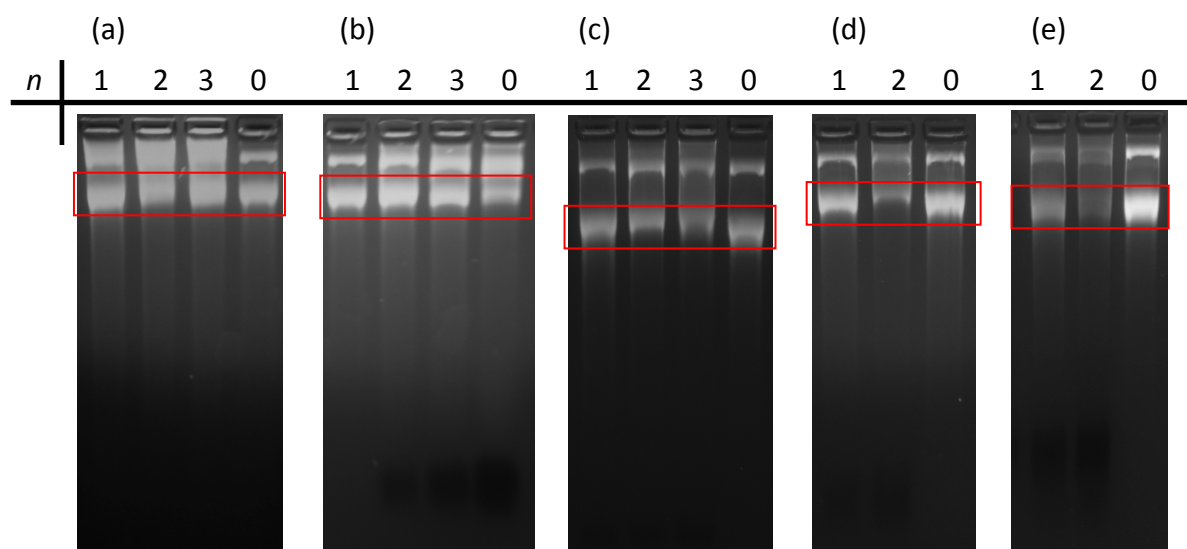

**Figure S1.** 1.5% agarose gel of (a) 5 nm AuNP-origami, (b) 10 nm AuNP-origami, (c) 15 nm AuNP-origami, (d) 20nm AuNP-origami, and (e) 30 nm AuNP-origami conjugates. The gels were pre-stained by ethidium bromide to visualize the band of the products.  $n$  represents the desired number of AuNP attached to DNA origami. The bands of desired product are highlighted by red boxes. The slower moving bands are probably cross-linked origami, as indicated by a previous study.<sup>2</sup>

**Table S1.** Dynamic viscosity and density of centrifugation media at  $20.0 \pm 0.1$  °C (average  $\pm$  limit of uncertainty)

| Notes                             | Volume fraction of iodixanol | Dynamic viscosity | Density               |
|-----------------------------------|------------------------------|-------------------|-----------------------|
|                                   | (%)                          | (mPa s)           | (g cm <sup>-3</sup> ) |
| in 1× TAE/Mg <sup>2+</sup> buffer | 0                            | 1.02              | 1.000                 |
| "                                 | 5                            | 1.14              | 1.027                 |
| "                                 | 10                           | 1.31              | 1.054                 |
| "                                 | 15                           | 1.49              | 1.079                 |
| "                                 | 20                           | 1.75              | 1.107                 |
| "                                 | 25                           | 2.10              | 1.134                 |
| "                                 | 30                           | 2.54              | 1.160                 |
| "                                 | 35                           | 3.21              | 1.188                 |
| "                                 | 40                           | 4.11              | 1.214                 |
| "                                 | 45                           | 5.42              | 1.241                 |
| "                                 | 50                           | 6.97              | 1.262                 |
| in water (OptiPrep™)              | 60                           | 14.33             | 1.320                 |

The limits of uncertainty on dynamic viscosity and density are  $\pm 0.01$  mPa s and  $\pm 0.001$  g cm<sup>-3</sup> respectively

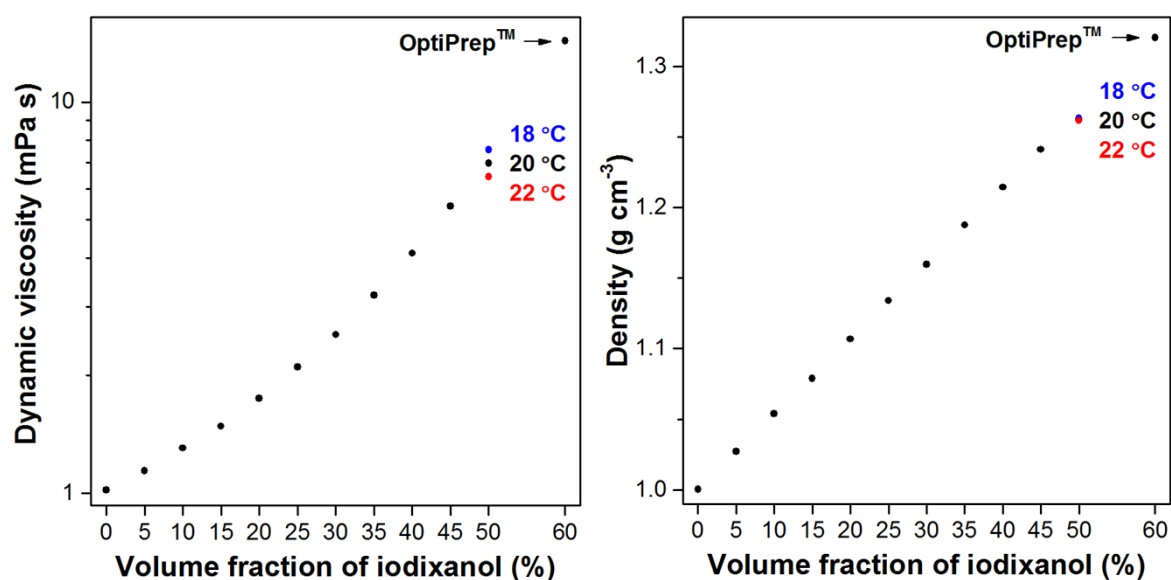

**Figure S2.** Dynamic viscosity and density increase as a function of volume fraction of iodixanol in water. The limits of uncertainty for all variables are smaller than the data points. A 2 °C variation in temperature around 20 °C, corresponds to the uncertainty in medium temperature during centrifugation, and results in an  $\approx 8\%$  variation in dynamic viscosity.

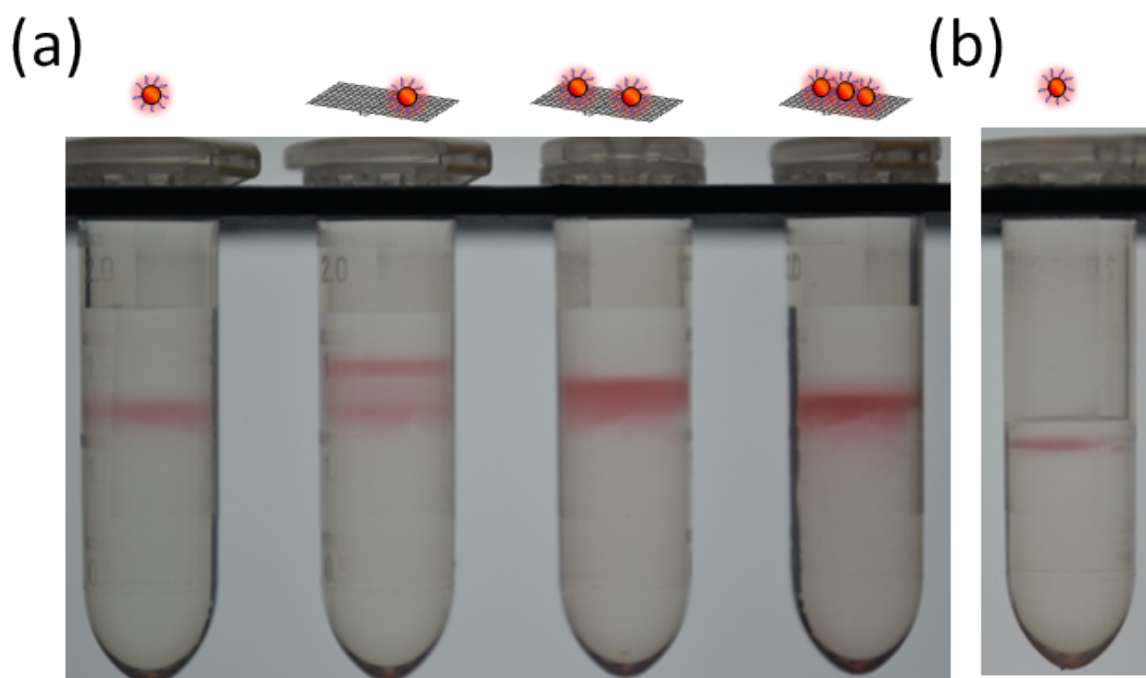

**Figure S3.** Separation of 10 nm AuNP constructs by centrifugation (a) after 240 min in 50% glycerol. Different constructs (2AuNP-origami and 3AuNP-origami) were not separated from free AuNPs. (b) 10 nm AuNP after 60 min of centrifugation in 50 % iodixanol. The layer of AuNP was not stable during centrifugation. The centrifugation speed was  $850 \text{ rad s}^{-1}$  ( $8100 \text{ rpm}$ ,  $68600 \text{ m s}^{-2}$ ,  $7000 \times g$ ) for both.

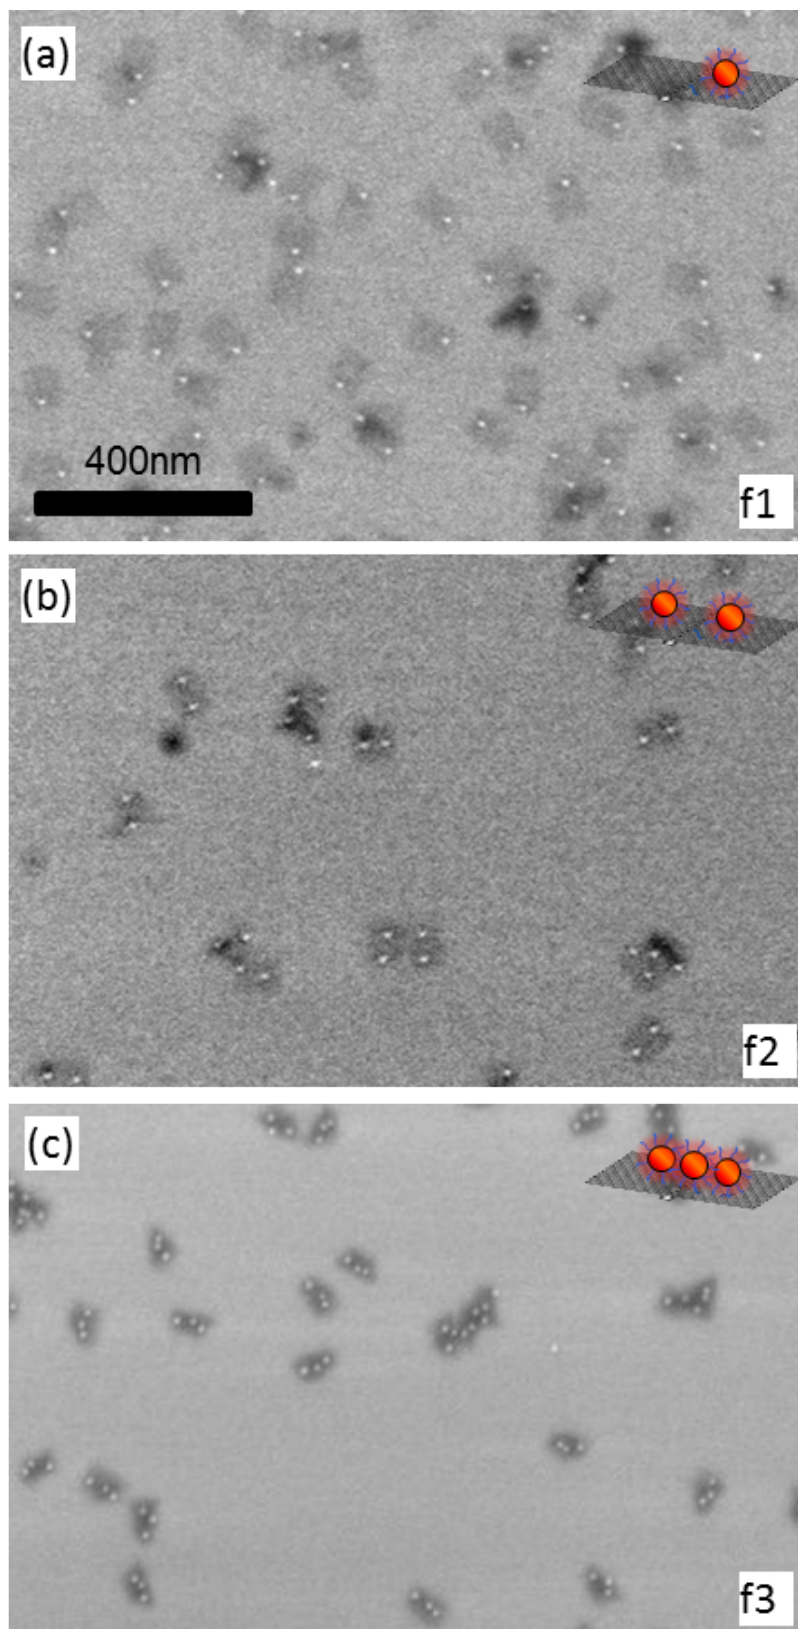

**Figure S4.** Typical SEM images of different fractions of  $10\text{ nm}$  AuNP-origami conjugates as labeled in Figure 2 (a) after centrifuge purification. The fraction f1 is  $(96.1 \pm 0.5)\%$  1AuNP-origami, f2 is  $(94.6 \pm 1.0)\%$  2AuNP-origami, and f3 is  $(92.9 \pm 1.3)\%$  3AuNP-origami.

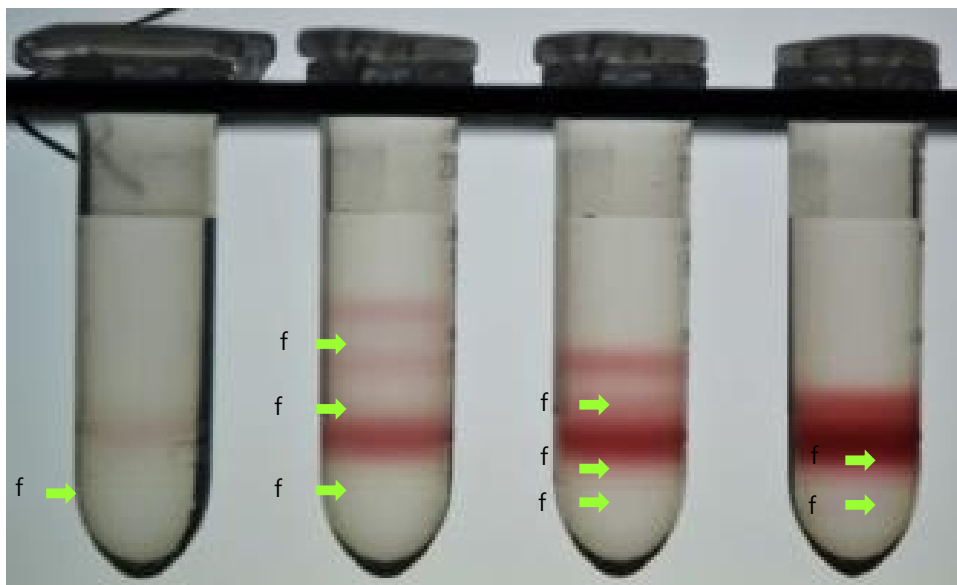

**Figure S5.** Separation of  $n10$  nm AuNP constructs by centrifugation. Different fractions of  $n10$  nm AuNP-origami constructs are labeled the same as Figure 2a. The centrifugation speed was  $850 \text{ rad s}^{-1}$  (8 100 rpm,  $68\,600 \text{ m}\cdot\text{s}^{-2}$ ,  $7\,000 \times g$ ).

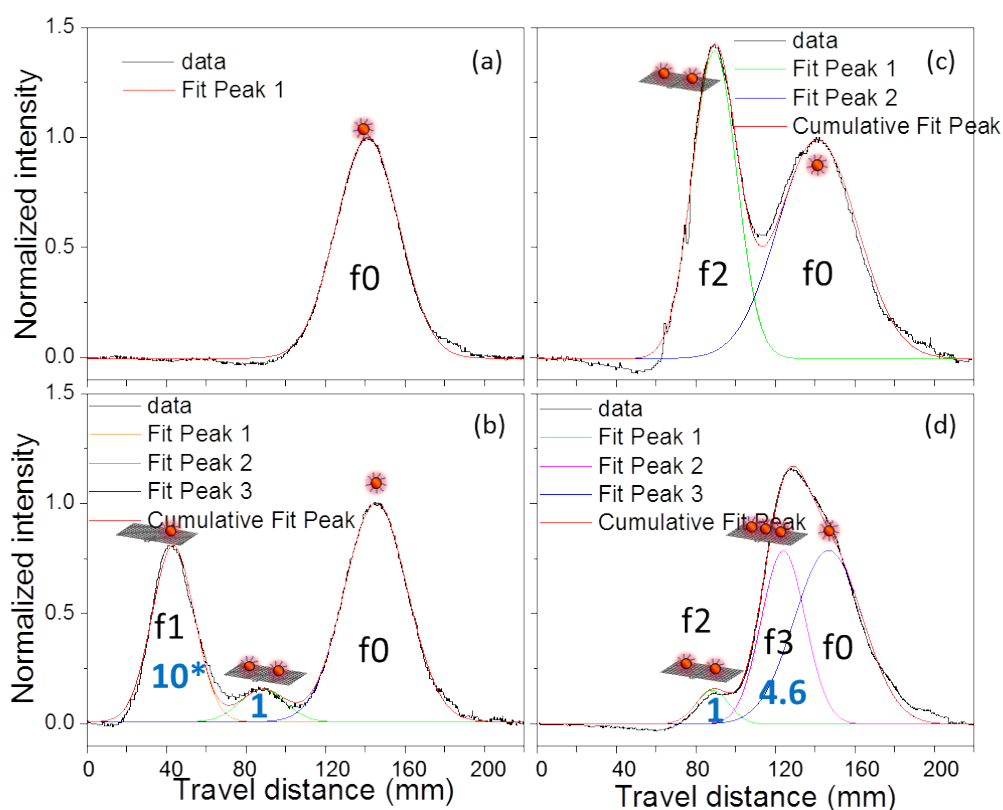

**Figure S6.** Centrifugograms of  $n10$  nm AuNP-origami conjugates of each tube from the left to the right ((a) to (d)) in Figure 2 (a). Each band has been labeled as Figure 2 and fitted by a Gaussian function. The blue numbers in (b) and (d) are the values of the calculated area of the corresponding peak divided by the number of AuNP. These and the following Gaussian fits are not quantitative, due to variability in background illumination intensity, but rather provide a qualitative estimate of the relative fractions of the various constructs present.



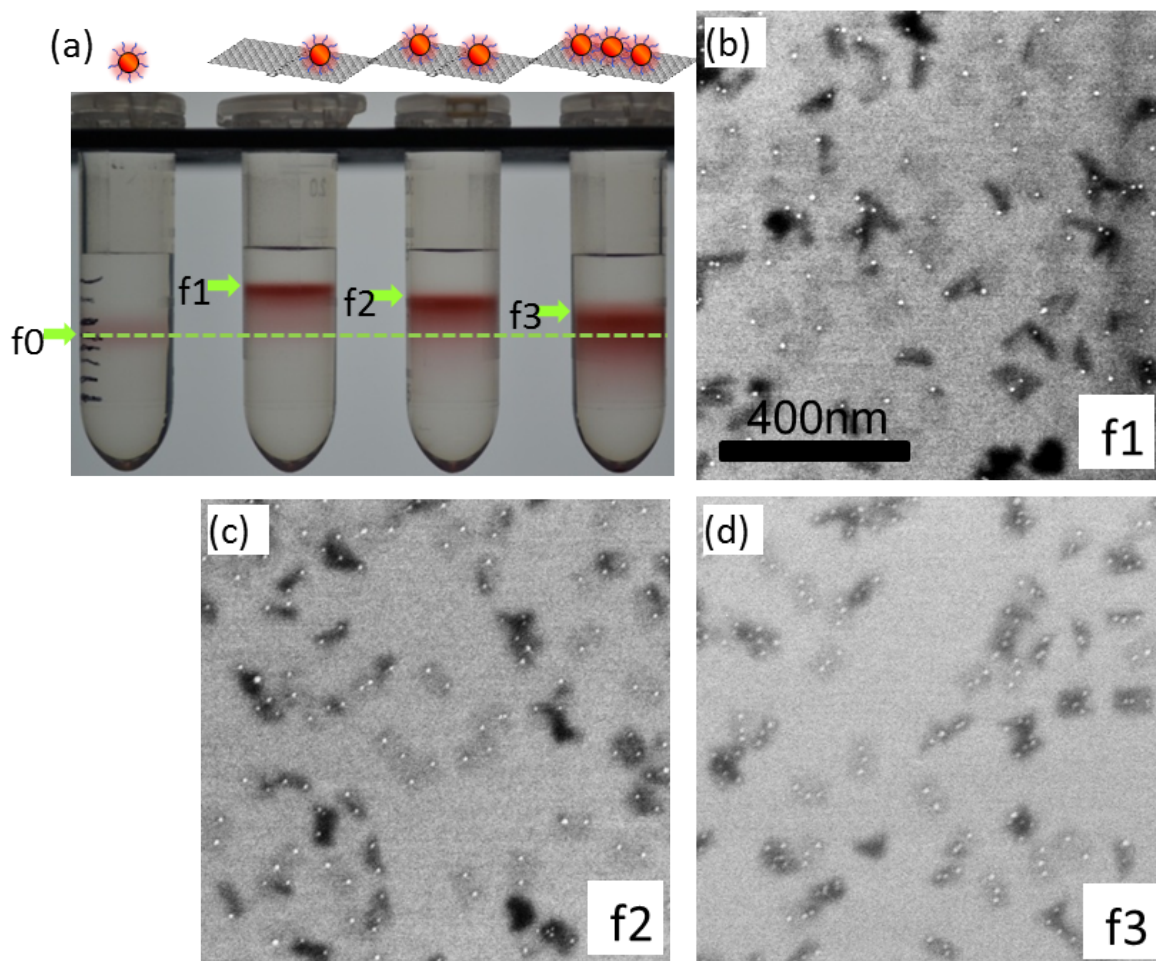

**Figure S7.** (a) Photograph of the centrifuge tubes containing different conjugates of 5 nm AuNP-DNA origami after spinning for 150 min at  $1100 \text{ rad s}^{-1}$  (10 500 rpm,  $114\,660 \text{ m s}^{-2}$ ,  $11\,700 \times g$ ). (b)-(d) SEM images of different fractions of AuNP-origami conjugates as labeled in (a). The yields are  $\approx 100\%$ ; within our measurement uncertainty.

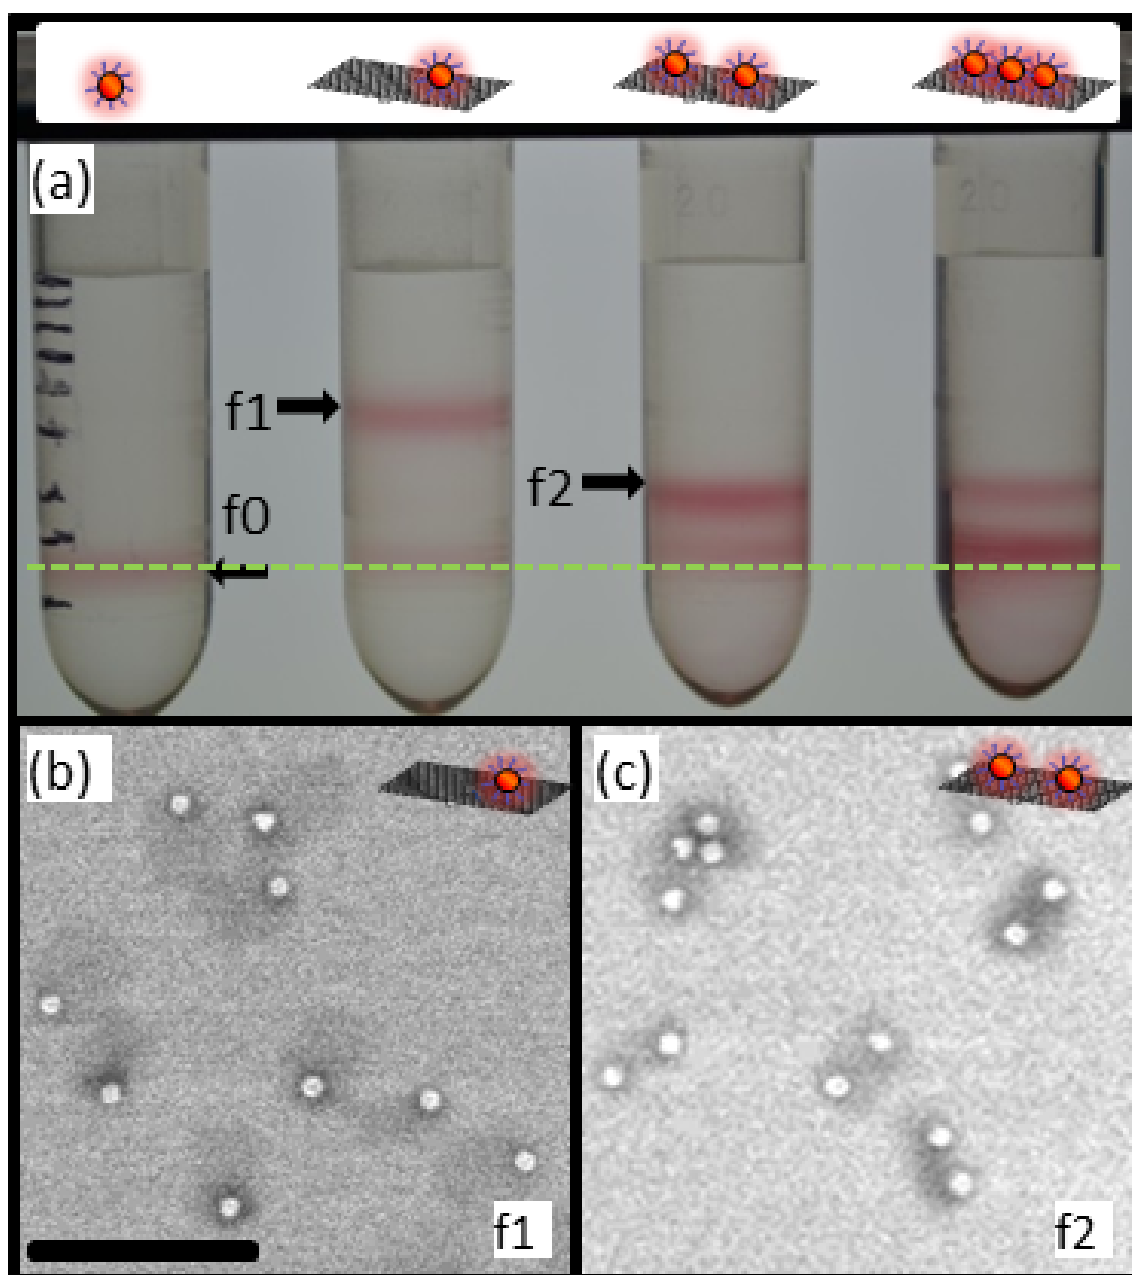

**Figure S8.** Separation of  $n$ 15 nm AuNP-DNA origami. (a) Photograph of centrifuge tubes containing different constructs after spinning for 3 h at  $681 \text{ rad s}^{-1}$  (6 500 rpm,  $44\,100 \text{ m s}^{-2}$ ,  $4500 \times g$ ). (b)-(d) Typical SEM images of different fractions of AuNP-origami constructs as labeled in (a). Schematics of the target product are shown for each tube. The fraction labeled f0 corresponds to free AuNPs. The SEM scale bar is 200 nm. Each construct ( $n = 1$  and 2) is clearly separated, based on the differences in sedimentation coefficients. Analysis of the SEM micrographs shows that the slowest fraction, f1, is  $(96.9 \pm 1.1)\%$  1AuNP-origami and the fraction f2 is  $(95.8 \pm 1.3)\%$  2AuNP-origami.

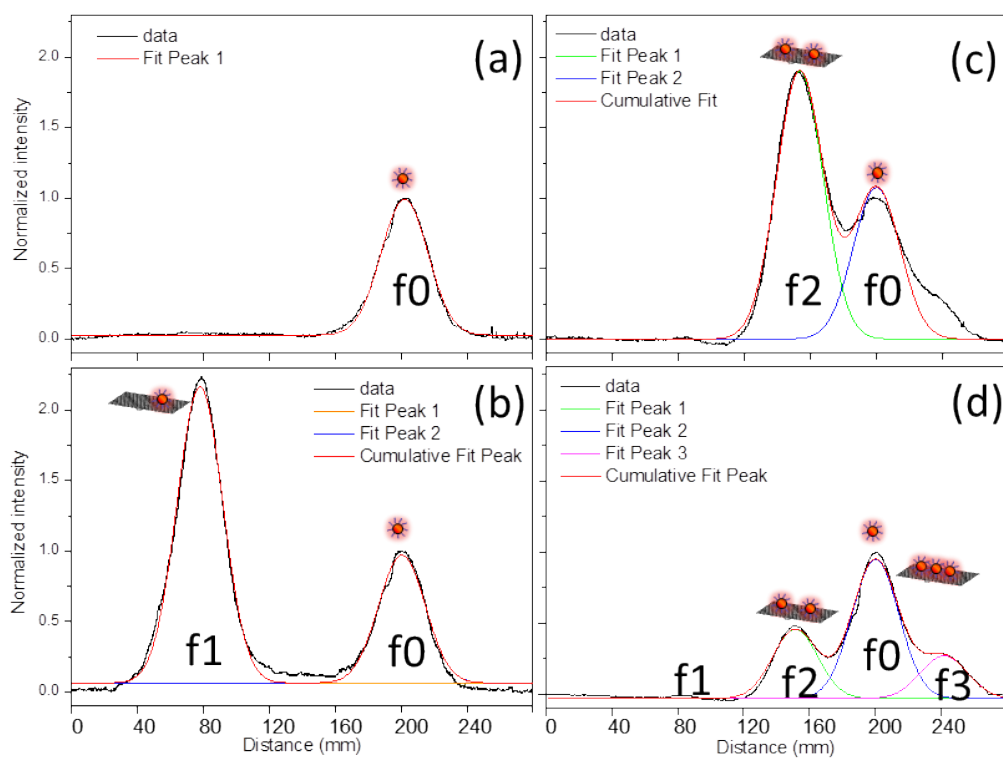

**Figure S9.** Centrifugation profiles of *n*15 nm AuNP-origami conjugates of each tube from the left to the right ((a) to (d)) in Figure 3 (a). Each band has been labeled as in Figure S7 and fitted by a Gaussian function.

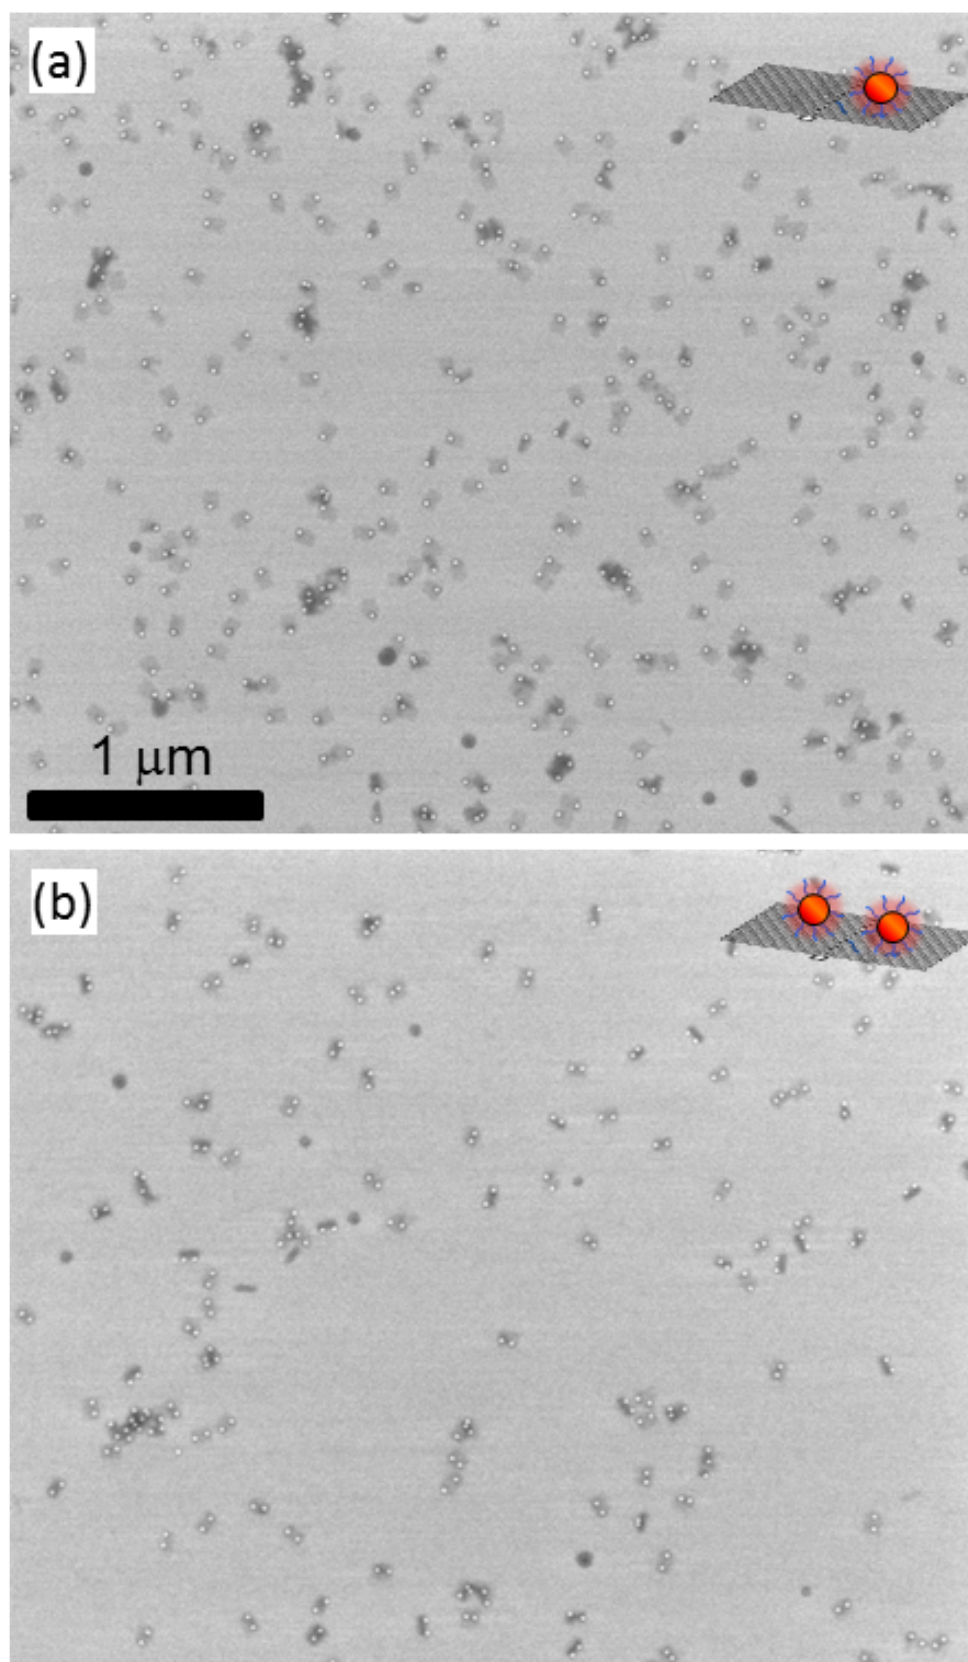

**Figure S10.** Typical SEM images of different fractions of 15 nm AuNP-origami conjugates after centrifuge purification. Each construct ( $n = 1$  and 2) is clearly separated, based on the differences in sedimentation coefficients. Analysis of the SEM micrographs shows that the slowest fraction f1 contains  $(96.9 \pm 1.1)\%$  1AuNP-origami and f2 is  $(95.8 \pm 1.3)\%$  2AuNP-origami.

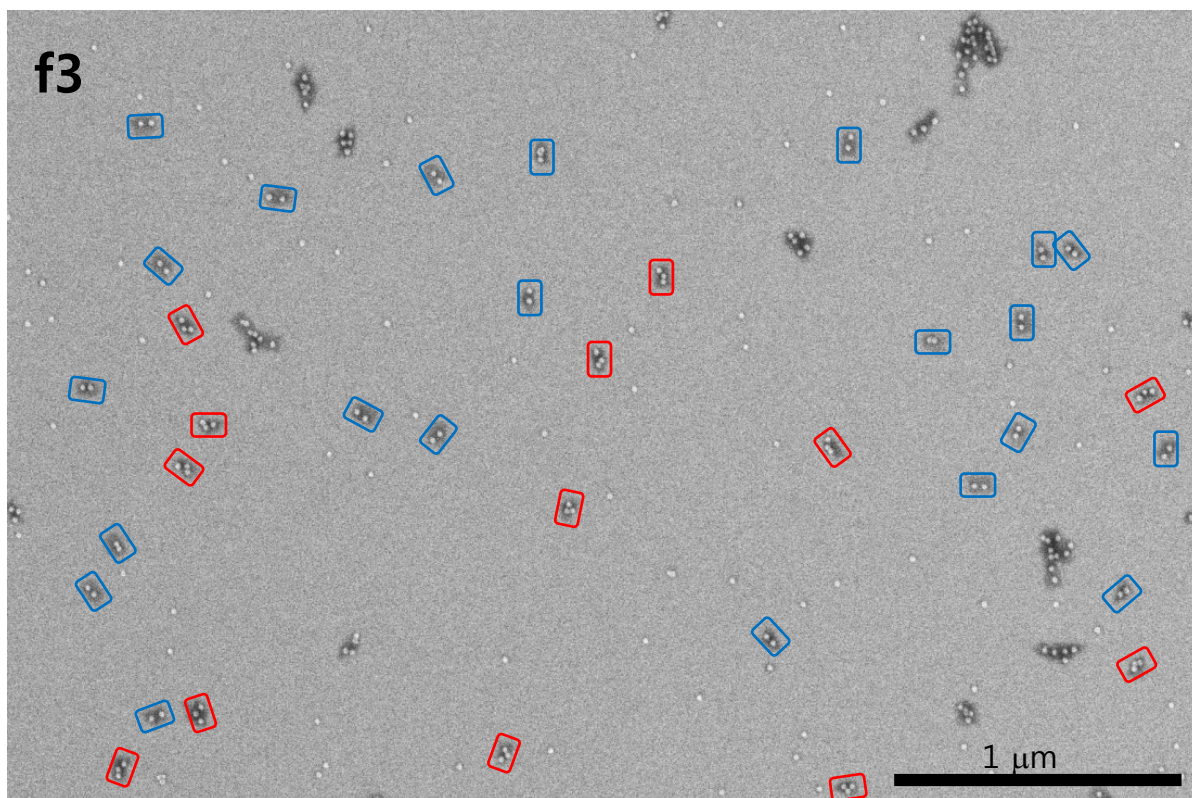

**Figure S11.** SEM images of the band f3 (Figure S7) separated from the centrifugation tube targeting 15 nm 3AuNP-origami. A blue rectangle highlights 2AuNP-origami and a red rectangle shows 3AuNP-origami. The fractions of 2AuNP-origami and 3AuNP-origami are  $(62 \pm 8)\%$  and  $(37 \pm 8)\%$ , respectively.



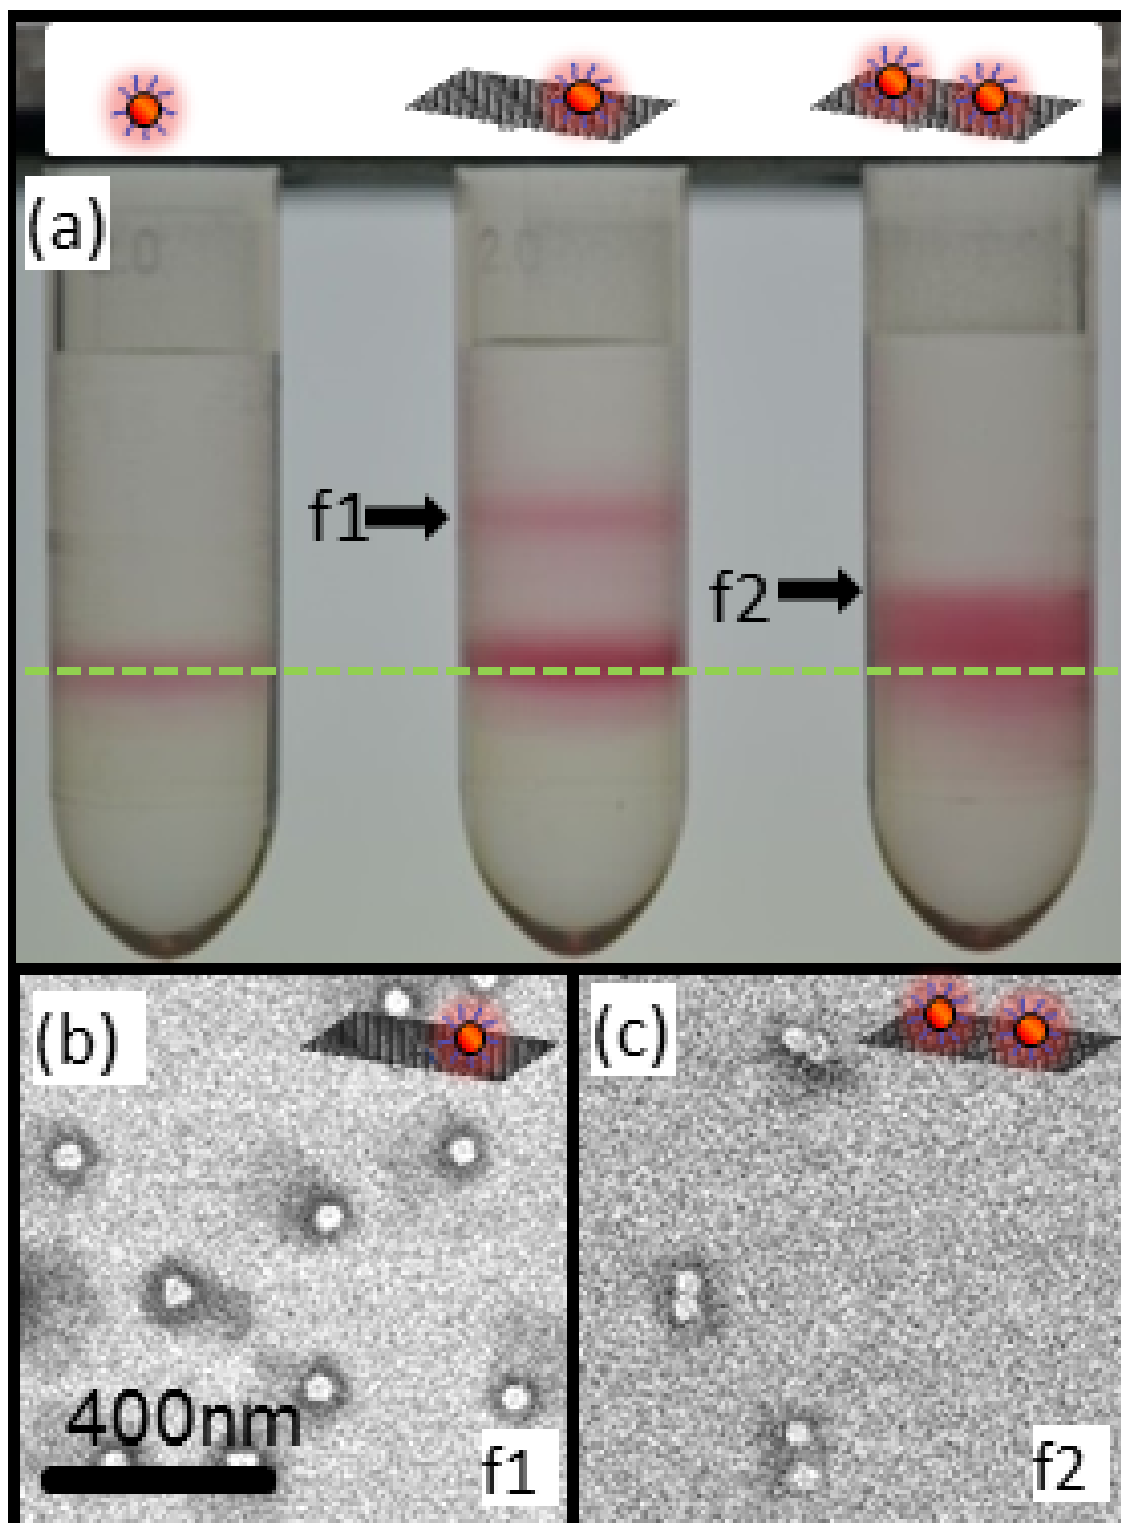

**Figure S12.** Separation of 20 nm AuNP-DNA origami. (a) Photograph of centrifuge tubes containing different constructs after spinning for 2 hours at  $508 \text{ rad s}^{-1}$  (4 850 rpm,  $24\,500 \text{ m s}^{-2}$ ,  $2\,500 \times g$ ). (b)-(d) Typical SEM images of different fractions of AuNP-origami constructs as labeled in (a). Schematics of the target product are shown for each tube. The SEM scale bar is 200 nm.

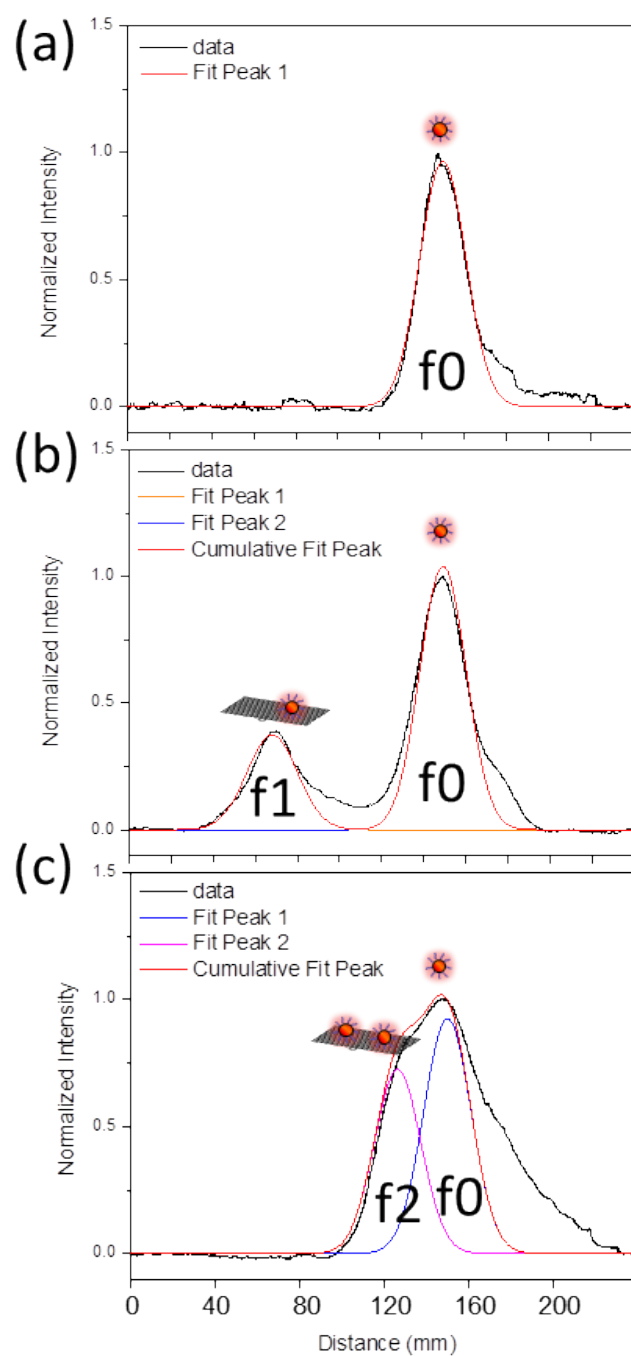

**Figure S13.** Centrifugam of  $n20$  nm AuNP-origami conjugates of each tube from the left to the right ((a) to (c)) in Figure S11 (a). Each band has been labeled as Figure S11 and fitted by a Gaussian function.

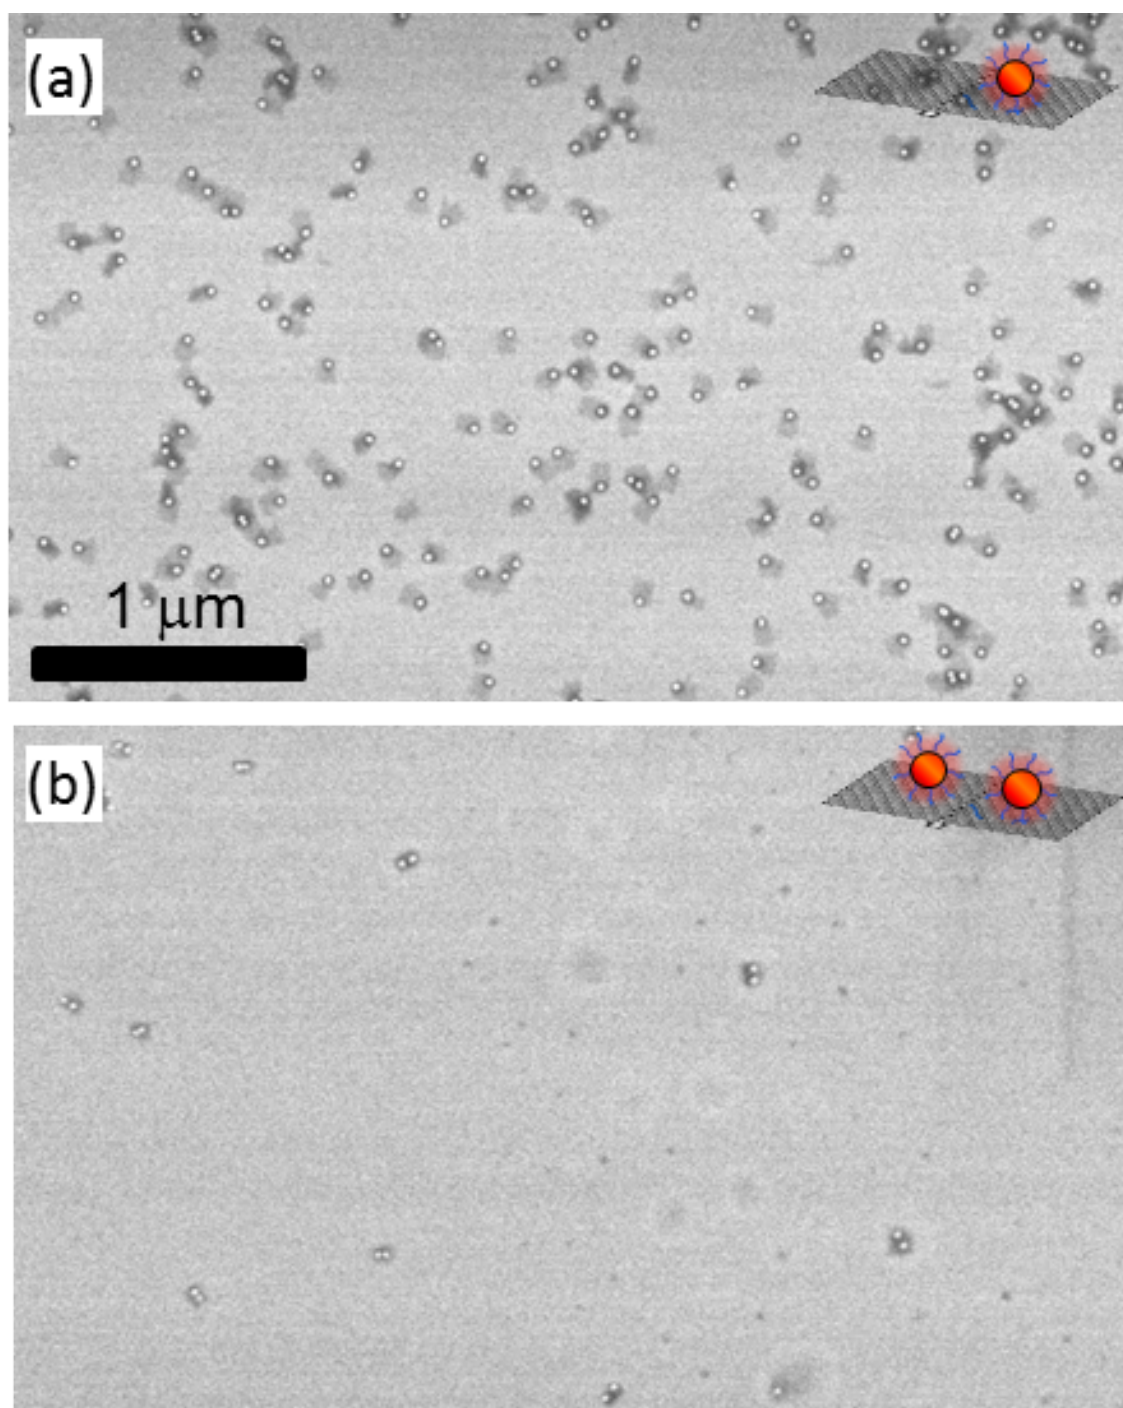

**Figure S14.** Typical SEM images of different fractions of 20 nm AuNP-origami conjugates purified by centrifugation. The extracted fractions, f1 and f2 are 1AuNP-origami,  $(97.0 \pm 1.6)\%$  and 2AuNP-origami,  $(94.3 \pm 5.8)\%$ , respectively, as determined from an analysis of SEM images.



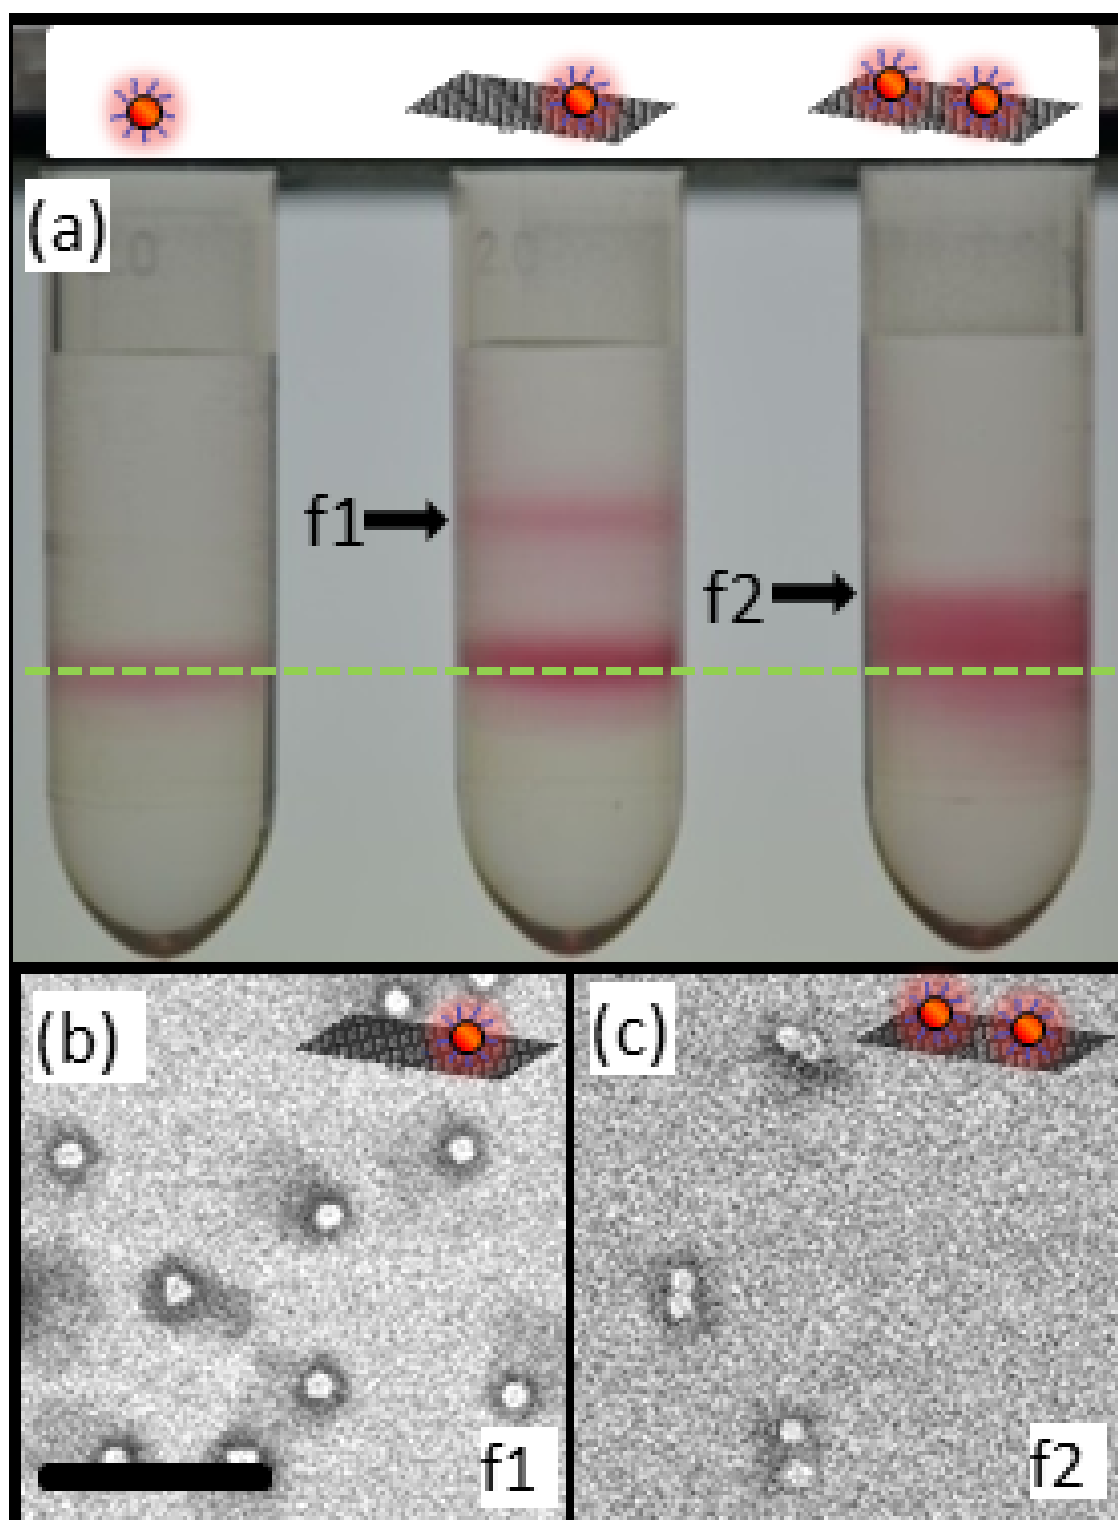

**Figure S15.** (a) Photograph of the centrifuge tubes containing  $n30$  nm AuNP-DNA origami after spinning for 2 h at  $287 \text{ rad s}^{-1}$  (2 740 rpm,  $7\,840 \text{ m s}^{-2}$ ,  $800 \times g$ ). (b)-(c) Typical SEM images of a fractions of AuNP-origami conjugates as labeled in (a).

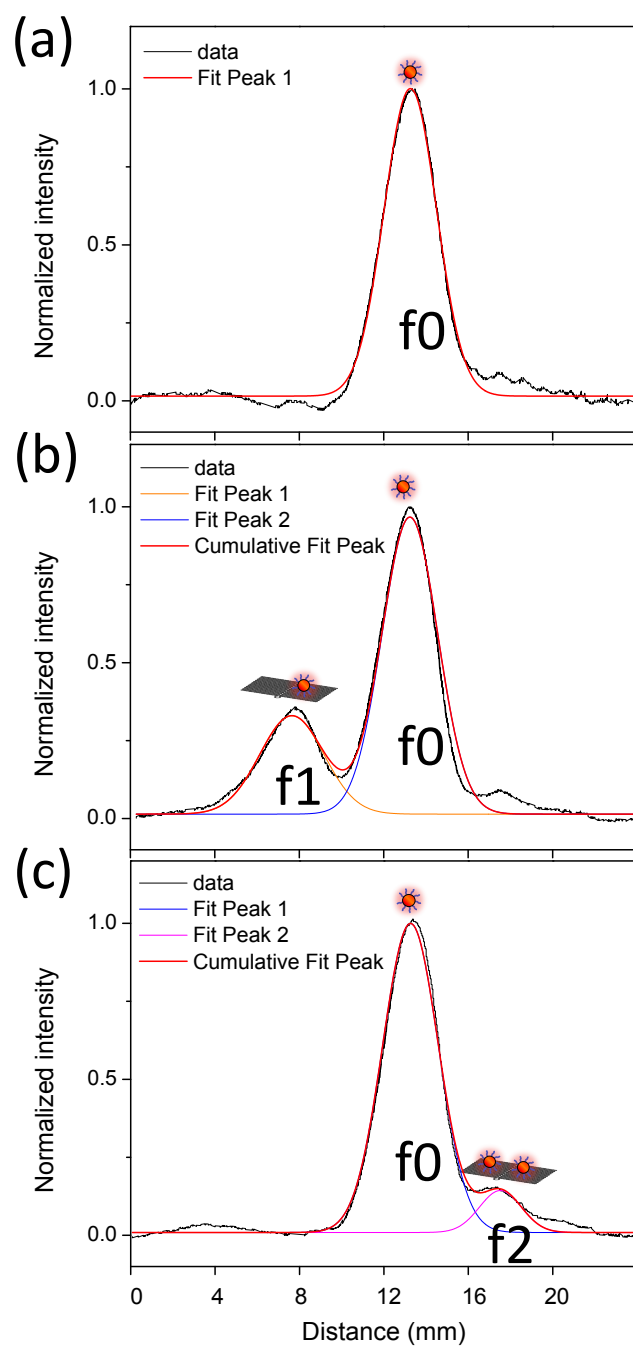

**Figure S16.** Centrifugation of  $n30$  nm AuNP-origami conjugates of each tube from the left to the right ((a) to (c)) in Figure S14 (a). Each band has been labeled as Figure S14 and fitted by a Gaussian function.

### Centrifugation Modeling Equations

We assume that AuNPs or  $n$ AuNP-origami ( $n$  is the number of AuNP bound to an origami) are isolated objects in solution, *i.e.*, “infinitely dilute solutions”, in which the objects experience only three forces during centrifugation in the reference frame of the centrifuge tube: a centrifugal force  $F_C$ , a buoyant force  $F_B$ , and a drag force  $F_D$ . The centrifugal force  $F_C$  is given by

$$F_C = m\omega^2 r, \quad (1)$$

where  $\omega$  is the angular velocity of the centrifuge,  $m$  is the mass of the object, and  $r$  is the distance of the object from the rotation axis. The buoyant force  $F_B$  is opposite in direction to the centrifugal force and is proportional to the mass  $m_0$  of fluid displaced by the object *via*<sup>[5]</sup>

$$F_B = -m_0\omega^2 r, \quad (2)$$

where  $\omega$  is the angular velocity and  $r$  is the distance of the object from the rotation axis. The drag force,  $F_D$  is expressed as the following,

$$F_D = -6\pi\eta_s R_H u \quad (3)$$

where  $u$  is the velocity of the object,  $\eta_s$  is the fluid viscosity, and  $R_H$  is the hydrodynamic radius of the object; collectively the terms  $6\pi\eta_s R_H$  are the drag coefficient for an object in a fluid medium.

Approximating,  $u = \frac{1}{2}(m-m_0)\omega^2 r t^2$ , and setting  $R_H$  proportional to  $a$ , the object radius, and  $(m-m_0)$  proportional to  $a^3$ , we see that the time taken to reach the terminal velocity is proportional to  $a/\sqrt{3\pi\eta}$ . Thus, for small objects, terminal velocity is reached in a very short time (less than  $10^{-6}$  s) during centrifugation, meaning that the object is always at its instantaneous terminal velocity throughout the separation medium. We therefore assume

$$F_C + F_B + F_D = 0, \quad (4)$$

which implies

$$u_t = \frac{(m - m_o)\omega^2 r}{6\pi\eta_s R_H}, \quad (5)$$

where  $u_t$  stands for terminal velocity.

Assuming that we know all of the quantities on the right-hand side of Equation (5), we may predict the total distance  $r_f$  that an object travels in during a fixed time interval by solving the equation

$$t = \int_{r_0}^{r_0+r_f} u_t^{-1}(r) dr, \quad (6)$$

where  $u_t^{-1}$  is the pace of the object (which depends on  $r$  via  $\eta_s$  and the fluid density  $\rho_{fluid}$ ),  $t$  is the total time the object is allowed to fall, and  $r_0$  is the initial position of the object relative to the axis of rotation. The physics of Equation (6) is straightforward: the time to travel a distance  $r_f$  is the sum over the infinitesimal paces of the object times the distance it travels at each pace. The difference in masses  $m - m_0$  can be written in the form

$$m - m_0 = V_{or}\Delta\rho_{or} + n(V_{au}\Delta\rho_{au} + V_{sh}\Delta\rho_{sh}), \quad (7)$$

where  $V_{or}$ ,  $V_{au}$ , and  $V_{sh}$  are the volumes of the DNA origami, AuNP, and DNA shell surrounding the AuNP, respectively; likewise, the  $\Delta\rho_{or}$ ,  $\Delta\rho_{au}$ , and  $\Delta\rho_{sh}$  are the densities of origami, AuNP, and shells surrounding the AuNP *relative* to the surrounding medium (i.e.,  $\Delta\rho_{or} = \rho_{or} - \rho_{fluid}$ , etc.). Combining Equation (5) – (7) gives

$$t = \int_{r_0}^{r_0+r_f} \frac{6\pi R_H \eta_s}{\omega^2 r [V_{or}\Delta\rho_{or} + n(V_{au}\Delta\rho_{au} + V_{sh}\Delta\rho_{sh})]} dr, \quad (8)$$

where  $\eta_s$  and the  $\Delta\rho$  depend on  $r$ .

In order to actually compute Equation (8), we assume that the AuNPs and DNA shells are spherical, which implies

$$V_{au} = \frac{4\pi a^3}{3} \quad (9)$$

$$V_{sh} = \frac{4\pi (a + a_d)^3}{3} - \frac{4\pi a^3}{3} \quad (10)$$

where  $a$  is the radius of the AuNP and  $a_d$  is the thickness of the DNA shell. We also take  $V_{or} = 14,000 \text{ nm}^3$  ( $100 \text{ nm} \times 70 \text{ nm} \times 2 \text{ nm}$ ) and assume that the fluid density and viscosity can be approximated as exponential functions of  $r$ . These are derived by first fitting the data in Table S1 to determine  $\eta$  and  $\rho$  as a function of iodixanol concentration and then fitting the values of  $\eta$  and  $\rho$  as a function of  $r$ . The integral in Equation (8) is computed numerically to find  $r_f$ .

The most significant sources of experimental error affecting this analytical model probably relate to uncertainties in the actual dynamic viscosity profile in the centrifuge tube. The principle sources for these are pipetting errors during the construction of the gradient, diffusion of the gradient prior to and during centrifugation, and temperature deviations from the set point during centrifugation.

### Band Width Analysis

We compute the widths of the sedimentation bands, which we assume to be approximately Gaussian, by calculating the sedimentation distances,  $r_f$ , for particles of radius  $\bar{a}$ ,  $(\bar{a} + \sigma)$  and  $(\bar{a} - \sigma)$ , where  $\bar{a}$  is the mean radius, and  $\sigma$  is the standard deviation in particle radius determined from TEM measurements. The normalized band width for each nanoparticle or construct is:

$$\frac{r_{f(\bar{a} + \sigma)} - r_{f(\bar{a} - \sigma)}}{r_{f(\bar{a})}} \quad (11)$$

The same procedure is followed for  $n$ AuNP-origami constructs, but we assume that the variations in AuNP size are uncorrelated, and therefore divide  $\sigma$  by  $\sqrt{n}$ , where  $n$  is 1, 2, or 3 to calculate the variation in the mass of nanoparticles attached to each construct. As noted in the main text, we assume a constant hydrodynamic radius,  $R_H$ , for all constructs equal to that measured by DLS for free origami.

Finally, we note that the absolute values of the measured and calculated distances do not agree. A sensitivity analysis of the possible sources of error suggests that the most probable cause of deviation is the likely difference between the actual and estimated dynamic viscosity profile along the centrifuge tube, as described above.

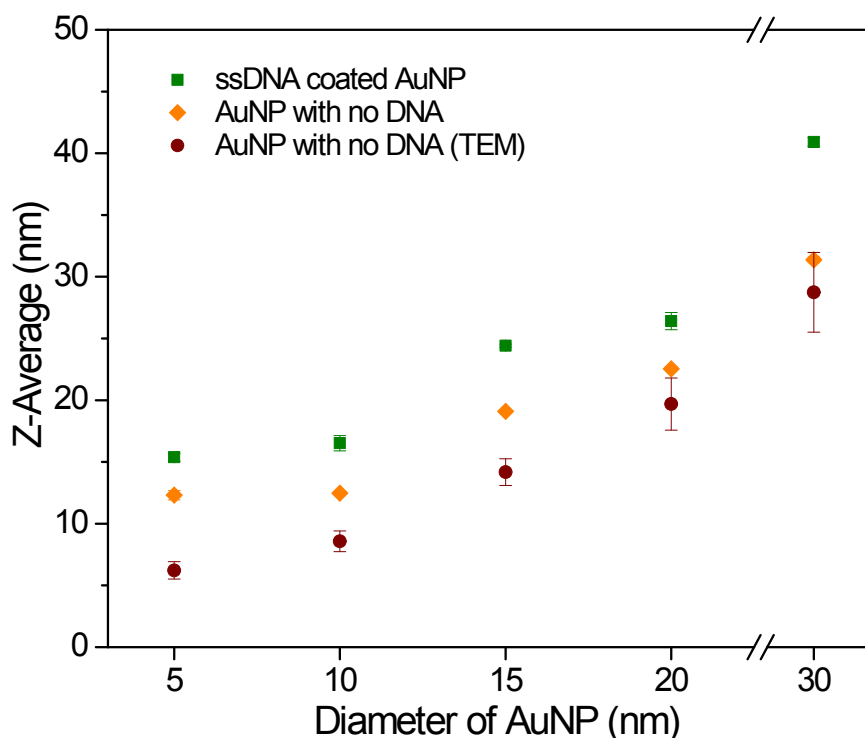

**Figure S17.** Diameter of AuNPs with or without a DNA coating measured by DLS and TEM. DLS measurements are performed in solution and report the hydrodynamic size of the particles. TEM measurements are performed in vacuum and quantify the size of the AuNPs alone, and are not sensitive to the presence of DNA or other surface functionalization. Vertical bars are one standard deviation.

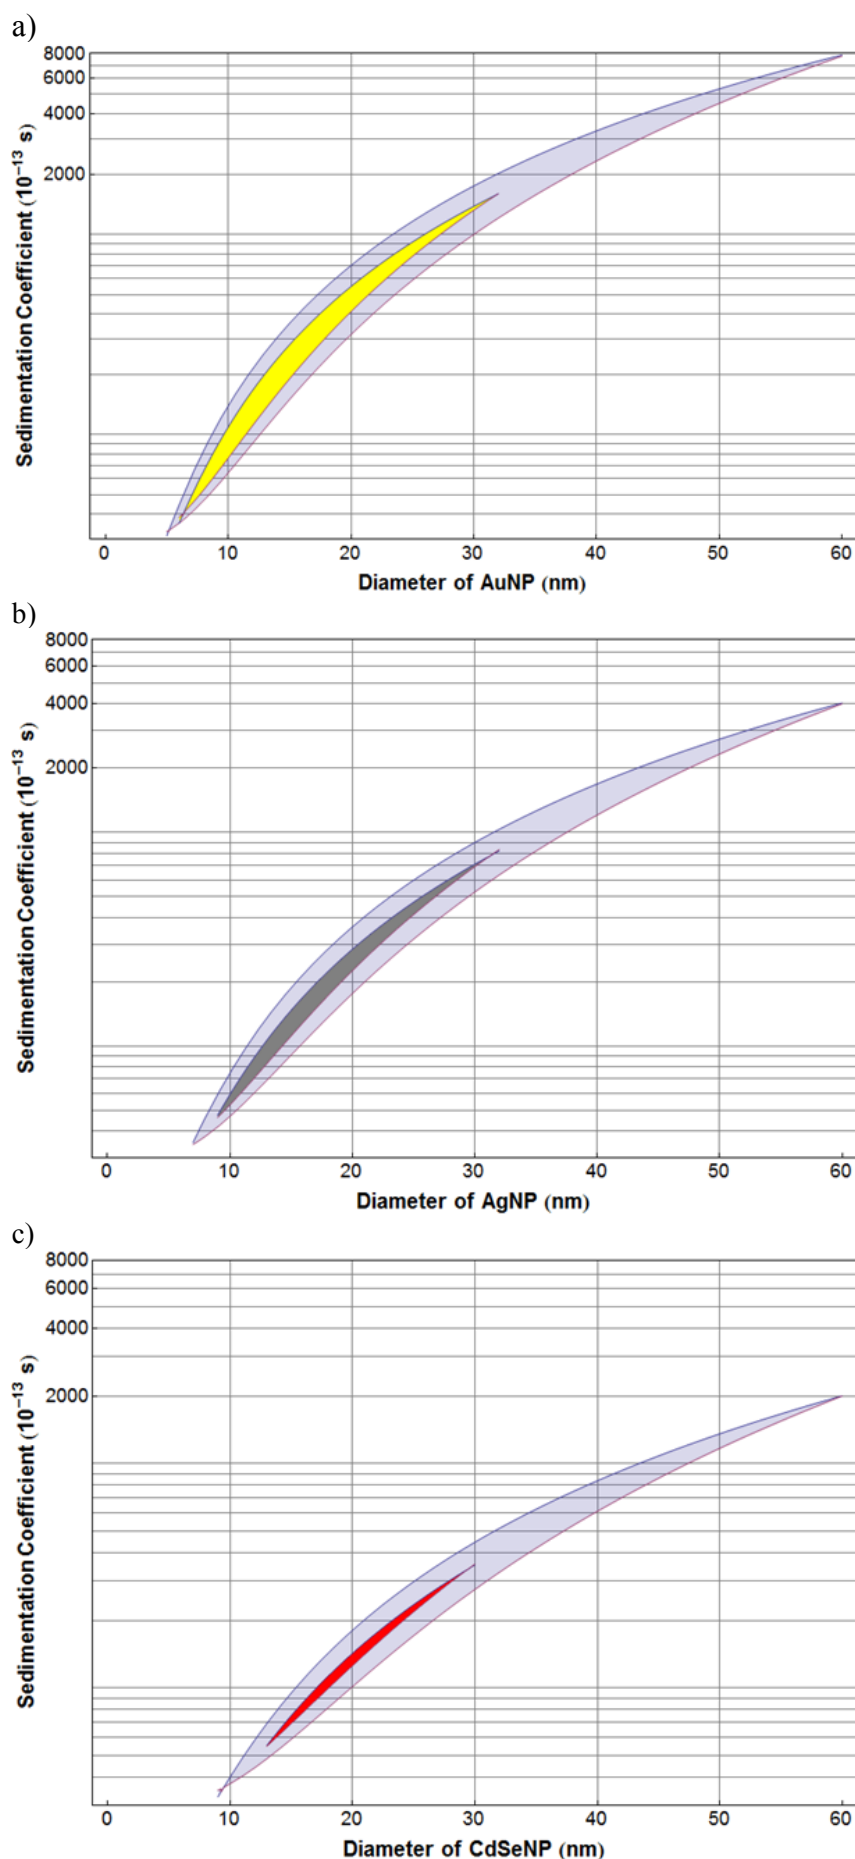

**Figure S18.**

Comparison of sedimentation coefficients vs. particle size for free gold nanoparticles and 1AuNP-origami constructs, free silver nanoparticles and 1AgNP-origami constructs, and free CdSe nanoparticles and 1CdSeNP-origami constructs. The larger shaded area represents the range of particle sizes over which separations can be achieved, assuming a monodisperse size distribution. The small shaded area represents the range of particle sizes over which separations can be achieved, assuming a size distribution which varies by  $\pm 10\%$  about the average. As the nanoparticle density decreases, the nanoparticle size must increase in order to add appreciable mass and thus change the sedimentation coefficient of the NP-origami complex. The densities of the three materials are:

Au,  $19.3 \times 10^3 \text{ kg m}^{-3}$ ;  
 Ag,  $10.5 \times 10^3 \text{ kg m}^{-3}$ ;  
 CdSe,  $5.8 \times 10^3 \text{ kg m}^{-3}$

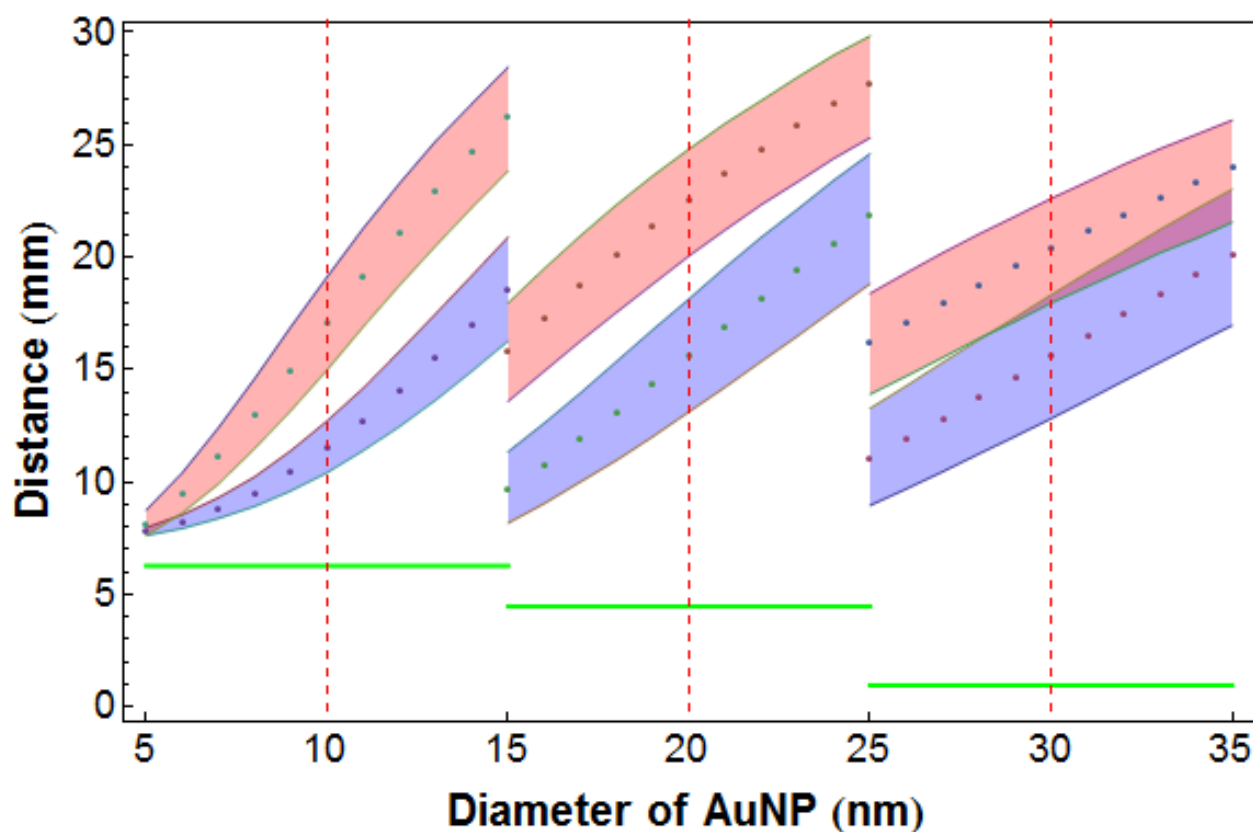

**Figure S19.** Sedimentation distance versus particle size for free gold nanoparticles and 1AuNP-origami constructs. The red bands represent the distance traveled by free gold nanoparticles assuming a nanoparticle size variation of  $\pm 10\%$ , and the blue bands the distance traveled by 1AuNP-origami constructs. The horizontal green lines are the distances traveled by undecorated origami.

## References

1. P. W. K. Rothmund, *Nature*, 2006, **440**, 302.
2. S. Pal, Z. Deng, B. Ding, H. Yan, Y. Liu, *Angew. Chem. Int. Ed.*, **2010**, 49, 2704.
3. F. C. Klebaner, *Introduction to Stochastic Calculus with Applications (Second Edition)*, Imperial College Press, London, England **2005**.



**Sequence of single stranded M13mp18** can be found at the website of New England

BioLabs Inc.;

<https://www.neb.com/~media/NebUs/Page%20Images/Tools%20and%20Resources/Interactive%20Tools/DNA%20Sequences%20and%20Maps/Text%20Documents/m13mp18gbk.txt>

### **Sequences of unmodified & modified staple strands**

In order to capture T18 coated AuNPs, specific staple strands at pre-determined locations were extended with 22 Adenines. The following strands are the modified strands at different binding sites.

14, 61, 85, 87, 119, 121, 145, 147, 171

T18 strand: 5'-/5DTPA/TTT TTT TTT TTT TTT TTT TTT -3'

**Table S2.** Sequences of unmodified staple strands

| <b>Name</b> | <b>Sequence (5' → 3')</b>            |
|-------------|--------------------------------------|
| 1           | CAAGCCCAATAGGAAC CCATGTACAAACAGTT    |
| 2           | AATGCCCCGTAAACAGT GCCCGTATCTCCCTCA   |
| 3           | TGCCTTGACTGCCTAT TTCGGAACAGGGATAG    |
| 4           | GAGCCGCCCCACCACC GGAACCGCGACGGAAA    |
| 5           | AACCAGAGACCCTCAG AACCGCCAGGGGTCAG    |
| 6           | TTATTCATAGGGAAGG TAAATATT CATTTCAGT  |
| 7           | CATAACCCGAGGCATA GTAAGAGC TTTTAAAG   |
| 8           | ATTGAGGGTAAAGGTG AATTATCAATCACCGG    |
| 9           | AAAAGTAATATCTTAC CGAAGCCCTTCCAGAG    |
| 10          | GCAATAGCGCAGATAG CCGAACAATTCAACCG    |
| 11          | CCTAATTTACGCTAAC GAGCGTCTAATCAATA    |
| 12          | TCTTACCAGCCAGTTA CAAAATAAATGAAATA    |
| 13          | ATCGGCTGCGAGCATG TAGAAACCTATCATAT    |
| 14          | CTAATTTATCTTTCCT TATCATTCATCCTGAA    |
| 15          | GCGTTATAGAAAAAGC CTGTTTATAG AAGGCCGG |
| 16          | GCTCATTTTTCGCATTA AATTTTTG AGCTTAGA  |
| 17          | AATTACTACAAATTCT TACCAGTAATCCCATC    |
| 18          | TTAAGACGTTGAAAAC ATAGCGATAACAGTAC    |
| 19          | TAGAATCCCTGAGAAG AGTCAATAGGAATCAT    |
| 20          | CTTTTACACAGATGAA TATACAGTAAACAATT    |
| 21          | TTTAACGTTTCGGGAGA AACAATAATTTTCCCT   |
| 22          | CGACAATAAGTATTA GACTTTACAATACCGA     |
| 23          | GGATTTAGCGTATTAA ATCCTTTGTTTTTCAGG   |
| 24          | ACGAACCAAAACATCG CCATTAAA TGGTGGTT   |
| 25          | GAACGTGGCGAGAAAG GAAGGGAA CAAACTAT   |
| 26          | TAGCCCTACCAGCAGA AGATAAAAACATTTGA    |
| 27          | CGGCCTTGCTGGTAAT ATCCAGAACGAACCTGA   |
| 28          | CTCAGAGCCACCACCC TCATTTTCTATTATT     |
| 29          | CTGAAACAGGTAATAA GTTTTAAACCCCTCAGA   |
| 30          | AGTGTACTTGAAAGTA TTAAGAGGCCGCCACC    |
| 31          | GCCACCACTCTTTTCA TAATCAAACCGTCACC    |

|    |                                    |
|----|------------------------------------|
| 32 | GTTTGCCACCTCAGAG CCGCCACCGATACAGG  |
| 33 | GACTTGAGAGACAAAA GGGCGACAAGTTACCA  |
| 34 | AGCGCCAACCATTTGG GAATTAGATTATTAGC  |
| 35 | GAAGGAAAATAAGAGC AAGAAACAACAGCCAT  |
| 36 | GCCCAATACCGAGGAA ACGCAATAGGTTTACC  |
| 37 | ATTATTTAACCCAGCT ACAATTTTCAAGAACG  |
| 38 | TATTTTGCTCCCAATC CAAATAAGTGAGTTAA  |
| 39 | GGTATTAAGAACAAGA AAAATAATTAAGCCA   |
| 40 | TAAGTCCTACCAAGTA CCGCACTCTTAGTTGC  |
| 41 | ACGCTCAAAATAAGAA TAAACACCGTGAATTT  |
| 42 | AGGCGTTACAGTAGGG CTTAATTGACAATAGA  |
| 43 | ATCAAAATCGTCGCTA TTAATTAACGGATTTCG |
| 44 | CTGTAAATCATAGGTC TGAGAGACGATAAATA  |
| 45 | CCTGATTGAAAGAAAT TGCGTAGACCCGAACG  |
| 46 | ACAGAAATCTTTGAAT ACCAAGTTCCTTGCTT  |
| 47 | TTATTAATGCCGTCAA TAGATAATCAGAGGTG  |
| 48 | AGATTAGATTTAAAAG TTTGAGTACACGTAA   |
| 49 | AGGCGGTCATTAGTCT TTAATGCGCAATATTA  |
| 50 | GAATGGCTAGTATTAA CACCGCCTCAACTAAT  |
| 51 | CCGCCAGCCATTGCAA CAGGAAAAATATTTTT  |
| 52 | CCCTCAGAACCGCCAC CCTCAGAACTGAGACT  |
| 53 | CCTCAAGAATACATGG CTTTTGATAGAACCAC  |
| 54 | TAAGCGTCGAAGGATT AGGATTAGTACCGCCA  |
| 55 | CACCAGAGTTCGGTCA TAGCCCCCGCCAGCAA  |
| 56 | TCGGCATTCCGCCGCC AGCATTGACGTTCCAG  |
| 57 | AATCACCAAATAGAAA ATTCATATATAACGGA  |
| 58 | TCACAATCGTAGCACC ATTACCATCGTTTTCA  |
| 59 | ATACCCAAGATAACCC ACAAGAATAAACGATT  |
| 60 | ATCAGAGAAAGAACTG GCATGATTTTATTTTG  |
| 61 | TTTTGTTTAAGCCTTA AATCAAGAATCGAGAA  |
| 62 | AGGTTTTGAACGTCAA AAATGAAAGCGCTAAT  |
| 63 | CAAGCAAGACGCGCCT GTTTATCAAGAATCGC  |
| 64 | AATGCAGACCGTTTTT ATTTTCATCTTGCGGG  |
| 65 | CATATTTAGAAATACC GACCGTGTTACCTTTT  |
| 66 | AATGGTTTACAACGCC AACATGTAGTTCAGCT  |
| 67 | TAACCTCCATATGTGA GTGAATAAACAAAATC  |
| 68 | AAATCAATGGCTTAGG TTGGGTACTAAATTT   |
| 69 | GCGCAGAGATATCAAA ATTATTTGACATTATC  |
| 70 | AACCTACCGCGAATTA TTCATTTCCAGTACAT  |
| 71 | ATTTTGCGTCTTTAGG AGCACTAAGCAACAGT  |
| 72 | CTAAAATAGAACAAAG AAACCACCAGGGTTAG  |
| 73 | GCCACGCTATACGTGG CACAGACAACGCTCAT  |
| 74 | GCGTAAGAGAGAGCCA GCAGCAAAAAGGTTAT  |
| 75 | GGAAATACCTACATTT TGACGCTCACCTGAAA  |
| 76 | TATCACCGTACTCAGG AGGTTTAGCGGGGTTT  |
| 77 | TGCTCAGTCAGTCTCT GAATTTACCAGGAGGT  |
| 78 | GGAAAGCGACCAGGCG GATAAGTGAATAGGTG  |
| 79 | TGAGGCAGGCGTCAGA CTGTAGCGTAGCAAGG  |
| 80 | TGCCTTTAGTCAGACG ATTGGCCTGCCAGAAT  |
| 81 | CCGGAAACACACCACG GAATAAGTAAGACTCC  |
| 82 | ACGCAAAGGTCACCAA TGAAACCAATCAAGTT  |
| 83 | TTATTACGGTCAGAGG GTAATTGAATAGCAGC  |

|     |                                                    |
|-----|----------------------------------------------------|
| 84  | TGAACAAACAGTATGT TAGCAAACATAAAAGAA                 |
| 85  | CTTTACAGTTAGCGAA CCTCCCGACGTAGGAA                  |
| 86  | GAGGCGTTAGAGAATA ACATAAAAGAACACCC                  |
| 87  | TCATTACCCGACAATA AACACATATTTAGGC                   |
| 88  | CCAGACGAGCGCCCAA TAGCAAGCAAGAACGC                  |
| 89  | AGAGGCATAATTTTCAT CTTCTGACTATAACTA                 |
| 90  | TTTTAGTTTTTTCGAGC CAGTAATAAATTCTGT                 |
| 91  | TATGTAAACCTTTTTT AATGGAAAAATTACCT                  |
| 92  | TTGAATTATGCTGATG CAAATCCACAAATATA                  |
| 93  | GAGCAAAAACTTCTGA ATAATGGAAGAAGGAG                  |
| 94  | TGGATTATGAAGATGA TGAACAAAATTTTCAT                  |
| 95  | CGGAATTATTGAAAGG AATTGAGGTGAAAAAT                  |
| 96  | ATCAACAGTCATCATA TTCCTGATTGATTGTT                  |
| 97  | CTAAAGCAAGATAGAA CCCTTCTGAATCGTCT                  |
| 98  | GCCAACAGTCACCTTG CTGAACCTGTTGGCAA                  |
| 99  | GAAATGGATTATTTAC ATTGGCAGACATTCTG                  |
| 100 | TTTT TATAAGTA TAGCCCGGCCGTCGAG                     |
| 101 | AGGGTTGA TTTT ATAAATCC TCATTAAATGATATTC            |
| 102 | ACAAACAA TTTT AATCAGTA GCGACAGATCGATAGC            |
| 103 | AGCACCGT TTTT TAAAGGTG GCAACATAGTAGAAAA            |
| 104 | TACATACA TTTT GACGGGAG AATTAACACAGGGAA             |
| 105 | GCGCATT TTTT GCTTATCC GGTATTCTAAATCAGA             |
| 106 | TATAGAAG TTTT CGACAAAA GGTAAAGTAGAGAATA            |
| 107 | TAAAGTAC TTTT CGCGAGAA AACTTTTTATCGCAAG            |
| 108 | ACAAAGAA TTTT ATTAATTA CATTTAACACATCAAG            |
| 109 | AAAACAAA TTTT TTCATCAA TATAATCCTATCAGAT            |
| 110 | GATGGCAA TTTT AATCAATA TCTGGTCACAAATATC            |
| 111 | AAACCCTC TTTT ACCAGTAA TAAAGGGATTACCA GTCACACGTTTT |
| 112 | CCGAAATCCGAAAATC CTGTTTGAAGCCGGAA                  |
| 113 | CCAGCAGGGGCAAAAT CCCTTATAAAGCCGGC                  |
| 114 | GCATAAAGTTCCACAC AACATACGAAGCGCCA                  |
| 115 | GCTCACAATGTAAAGC CTGGGGTGGGTTTGCC                  |
| 116 | TTCGCCATTGCCGGAA ACCAGGCATTAAATCA                  |
| 117 | GCTTCTGGTCAGGCTG CGCAACTGTGTTATCC                  |
| 118 | GTAAAAATTTTAACCA ATAGGAACCCGGCACC                  |
| 119 | AGACAGTCATTCAAAA GGGTGAGAAGCTATAT                  |
| 120 | AGGTAAAGAAATCACC ATCAATATAATATTTT                  |
| 121 | TTTCATTTGGTCAATA ACCTGTTTATATCGCG                  |
| 122 | TCGCAAATGGGGCGCG AGCTGAAATAATGTGT                  |
| 123 | TTTTAATTGCCCGAAA GACTTCAAAACACTAT                  |
| 124 | AAGAGGAACGAGCTTC AAAGCGAAGATACATT                  |
| 125 | GGAATTACTCGTTTAC CAGACGACAAAAGATT                  |
| 126 | GAATAAGGACGTAACA AAGCTGCTCTAAAACA                  |
| 127 | CCAAATCACTTGCCCT GACGAGAACGCCAAAA                  |
| 128 | CTCATCTTGAGGCAAA AGAATACAGTGAATTT                  |
| 129 | AAACGAAATGACCCCC AGCGATTATTCATTAC                  |
| 130 | CTTAAACATCAGCTTG CTTTCGAGCGTAACAC                  |
| 131 | TCGGTTTAGCTTGATA CCGATAGTCCAACCTA                  |
| 132 | TGAGTTTCGTCACCAG TACAACTTAATTGTA                   |
| 133 | CCCCGATTTAGAGCTT GACGGGGAAATCAAAA                  |
| 134 | GAATAGCCGCAAGCGG TCCACGCTCCTAATGA                  |
| 135 | GAGTTGCACGAGATAG GGTTGAGTAAGGGAGC                  |

|     |                                    |
|-----|------------------------------------|
| 136 | GTGAGCTAGTTTCCTG TGTGAAATTTGGGAAG  |
| 137 | TCATAGCTACTCACAT TAATTGCGCCCTGAGA  |
| 138 | GGCGATCGCACTCCAG CCAGCTTTGCCATCAA  |
| 139 | GAAGATCGGTGCGGGC CTCTTCGCAATCATGG  |
| 140 | AAATAATTTTAAATTG TAAACGTTGATATTCA  |
| 141 | GCAAAATATCGCGTCTG GCCTTCCTGGCCTCAG |
| 142 | ACCGTTCTAAATGCAA TGCCTGAGAGGTGGCA  |
| 143 | TATATTTTAGCTGATA AATTAATGTTGTATAA  |
| 144 | TCAATTCTTTTAGTTT GACCATTACCAGACCG  |
| 145 | CGAGTAGAACTAATAG TAGTAGCAAACCCTCA  |
| 146 | GAAGCAAAAAAGCGGA TTGCATCAGATAAAAA  |
| 147 | TCAGAAGCCTCCAACA GGTCAGGATCTGCGAA  |
| 148 | CCAAAATATAATGCAG ATACATAAACACCAGA  |
| 149 | CATTCAACGCGAGAGG CTTTTGCATATTATAG  |
| 150 | ACGAGTAGTGACAAGA ACCGGATATACCAAGC  |
| 151 | AGTAATCTTAAATTGG GCTTGAGAGAATACCA  |
| 152 | GCGAAACATGCCACTA CGAAGGCATGCGCCGA  |
| 153 | ATACGTAAAAGTACAA CGGAGATTTTCATCAAG |
| 154 | CAATGACACTCCAAAA GGAGCCTTACAACGCC  |
| 155 | AAAAAAGGACAACCAT CGCCCACGCGGGTAAA  |
| 156 | TGTAGCATTCCACAGA CAGCCCTCATCTCCAA  |
| 157 | GTAAAGCACTAAATCG GAACCCTAGTTGTTCC  |
| 158 | AGTTTGAGGCCCTTCA CCGCCTGGTTGCGCTC  |
| 159 | AGCTGATTACAAGAGT CCACTATTGAGGTGCC  |
| 160 | ACTGCCCGCCGAGCTC GAATTCGTTATTACGC  |
| 161 | CCCGGGTACTTTCCAG TCGGGAAACGGGCAAC  |
| 162 | CAGCTGGCGGACGACG ACAGTATCGTAGCCAG  |
| 163 | GTTTGAGGGAAAGGGG GATGTGCTAGAGGATC  |
| 164 | CTTTCATCCCCAAAAA CAGGAAGACCGGAGAG  |
| 165 | AGAAAAGCAACATTAA ATGTGAGCATCTGCCA  |
| 166 | GGTAGCTAGGATAAAA ATTTTATGTTAACATC  |
| 167 | CAACGCAATTTTTGAG AGATCTACTGATAATC  |
| 168 | CAATAAATACAGTTGA TTCCCAATTTAGAGAG  |
| 169 | TCCATATACATACAGG CAAGGCAACTTTATTT  |
| 170 | TACCTTTAAGGTCTTT ACCCTGACAAAGAAGT  |
| 171 | CAAAAATCATTGCTCC TTTTGATAAGTTTCAT  |
| 172 | TTTGCCAGATCAGTTG AGATTTAGTGGTTTAA  |
| 173 | AAAGATTCAAGGGGGTA ATAGTAAACCATAAAT |
| 174 | TTTCAACTATAGGCTG GCTGACCTTGATCAT   |
| 175 | CCAGGCGCTTAATCAT TGTGAATTACAGGTAG  |
| 176 | CGCCTGATGGAAGTTT CCATTAAACATAACCG  |
| 177 | TTTCATGAAAATTGTG TCGAAATCTGTACAGA  |
| 178 | ATATATTCTTTTTTCA CGTTGAAAATAGTTAG  |
| 179 | AATAATAAGGTCGCTG AGGCTTGCAAAGACTT  |
| 180 | CGTAACGATCTAAAGT TTTGTCGTGAATTGCG  |
| 181 | ACCCAAATCAAGTTTT TTGGGGTCAAAGAACG  |
| 182 | TGGACTCCCTTTTCAC CAGTGAGACCTGTCTG  |
| 183 | TGGTTTTTAACGTCAA AGGGCGAAGAACCATC  |
| 184 | GCCAGCTGCCTGCAGG TCGACTCTGCAAGGCG  |
| 185 | CTTGCATGCATTAATG AATCGGCCCGCCAGGG  |
| 186 | ATTAAGTTCGCATCGT AACCGTGCGAGTAACA  |
| 187 | TAGATGGGGGGTAACG CCAGGGTTGTGCCAAG  |

|        |                                                       |
|--------|-------------------------------------------------------|
| 188    | ACCCGTCGTCATATGT ACCCCGGTAAAGGCTA                     |
| 189    | CATGTCAAGATTCTCC GTGGGAACCGTTGGTG                     |
| 190    | TCAGGTCACCTTTTGCG GGAGAAGCAGAATTAG                    |
| 191    | CTGTAATATTGCCTGA GAGTCTGGAAACTAG                      |
| 192    | CAAAATTAAAGTACGG TGTCTGGAAGAGGTCA                     |
| 193    | TGCAACTAAGCAATAA AGCCTCAGTTATGACC                     |
| 194    | TTTTTGCGCAGAAAAC GAGAATGAATGTTTAG                     |
| 195    | AAACAGTTGATGGCTT AGAGCTTATTTAAATA                     |
| 196    | ACTGGATAACGGAACA ACATTATTACCTTATG                     |
| 197    | ACGAACTAGCGTCCAA TACTGCGGAATGCTTT                     |
| 198    | CGATTTTAGAGGACAG ATGAACGGCGCGACCT                     |
| 199    | CTTTGAAAAGAACTGG CTCATTATTTAATAAA                     |
| 200    | GCTCCATGAGAGGCTT TGAGGACTAGGGAGTT                     |
| 201    | ACGGCTACTTACTTAG CCGGAACGCTGACCAA                     |
| 202    | AAAGGCCGAAAGGAAC AACTAAAGCTTTCCAG                     |
| 203    | GAGAATAGCTTTTGCG GGATCGTCGGGTAGCA                     |
| 204    | ACGTTAGTAAATGAAT TTTCTGTAAGCGGAGT                     |
| 205    | TTTT CGATGGCC CACTACGTAAACCGTC                        |
| 206    | TATCAGGG TTTT CGGTTTGC GTATTGGGAACGCGCG               |
| 207    | GGGAGAGG TTTT TGTA AAC GACGGCCATTCCCAGT               |
| 208    | CACGACGT TTTT GTAATGGG ATAGGTCA AACGCGCG              |
| 209    | GATTGACC TTTT GATGAACG GTAATCGTAGCAAACA               |
| 210    | AGAGAATC TTTT GGTTGTAC CAAAAACAAGCATAAA               |
| 211    | GCTAAATC TTTT CTGTAGCT CAACATGTATTGCTGA               |
| 212    | ATATAATG TTTT CATTGAAT CCCCTCAAATCGTCA                |
| 213    | TAAATATT TTTT GGAAGAAA AATCTACGACCAGTCA               |
| 214    | GGACGTTG TTTT TCATAAGG GAACCGAAAGGCGCAG               |
| 215    | ACGGTCAA TTTT GACAGCAT CGGAACGAACCCTCAG               |
| 216    | CAGCGAAAA TTTT ACTTTCA ACAGTTTCTGGGATTT TGCTAAAC TTTT |
| Loop1  | AACATCACTTGCCTGAGTAGAAGAACT                           |
| Loop2  | TGTAGCAATACTTCTTTGATTAGTAAT                           |
| Loop3  | AGTCTGTCCATCACGCAAATTAACCGT                           |
| Loop4  | ATAATCAGTGAGGCCACCGAGTAAAAG                           |
| Loop5  | ACGCCAGAATCCTGAGAAGTGT TTTT                           |
| Loop6  | TTAAAGGGATTTTAGACAGGAACGGT                            |
| Loop7  | AGAGCGGGAGCTAAACAGGAGGCCGA                            |
| Loop8  | TATAACGTGCTTTCCTCGTTAGAATC                            |
| Loop9  | GTACTATGGTTGCTTTGACGAGCACG                            |
| Loop10 | GCGCTTAATGCGCCGCTACAGGGCGC                            |
